# Supplementary material
Source: publisher figshare collection journal article supplement (https://diabetesjournals.figshare.com/articles/dataset/_/28696799)
Supplement: Supplementary file 1 [file 1]

## Sheet: Table of content
Lipidomic markers of processed meat and unprocessed red meat intake and risk of diabetes in American Indians. Xiaoxiao Wen, et al.
Online Supplemental Tables
Supplemental Table S1. Plasma lipid species associated with red or processed meat intake (P<0.05)
Supplemental Table S2. Plasma lipid species associated with red or processed meat intake (q<0.05) and incident T2D
Supplemental Table S3. Lipids associated with both unprocessed red and processed meat intake (P<0.05)
Supplemental Table S4. Meat intake-related lipids (q<0.05) associated with glucose/insuin homeostasis metrics
Supplemental Table S5. Associations of red or processed meat intake with glucose/insulin metrics
Supplemental Table S6. Mediation effects of lipids on the meat intake-fasting glucose association
Supplemental Table S7. Lipid species associated with red or processed meat intake (P<0.05) in male and female
Supplemental Table S8. Lipid species associated with red or processed meat intake (P<0.05), further adjusted for grains
Supplemental Table S9. Lipid species associated with red or processed meat intake (P<0.05), further adjusted for red or processed meat intake
Supplemental Table S10. Lipid species associated with red or processed meat intake (P<0.05), further adjusted for vegetables
Supplemental Table S11. Lipid species associated with red or processed meat intake (P<0.05), further adjusted for dairy
Supplemental Table S12. Lipid species associated with red or processed meat intake (P<0.05), further adjusted for four dietary variables

## Sheet: suppl_tableS1
Supplemental Table S1. Plasma lipid species associated with red or processed meat intake (P<0.05)
		Association with meat intake
Lipids	Class	Beta (95%CI)¹	P value	q value2	FDR-BH3	P-adjust(Meff)4
Red meat-related lipids
CE(18:0)	Cholesterol ester	0.06 ( 0.03, 0.10)	0.001	0.036	0.007	0.439
CE(18:1)	Cholesterol ester	0.05 ( 0.01, 0.09)	0.008	0.117	0.021	1
CE(18:3)	Cholesterol ester	0.05 ( 0.01, 0.08)	0.011	0.131	0.024	1
CE(20:2)	Cholesterol ester	0.04 ( 0.01, 0.08)	0.026	0.205	0.037	1
CE(20:3)	Cholesterol ester	0.05 ( 0.01, 0.08)	0.013	0.143	0.026	1
CE(20:4)	Cholesterol ester	0.04 ( 0.01, 0.08)	0.023	0.195	0.035	1
CE(20:5)	Cholesterol ester	0.05 ( 0.01, 0.08)	0.011	0.136	0.025	1
CE(22:2)	Cholesterol ester	0.04 ( 0.00, 0.07)	0.042	0.248	0.045	1
CER(d34:0)	Ceramide	-0.04 (-0.08, 0.00)	0.031	0.223	0.041	1
PC(13:1/26:4)	Phosphatidylcholine	0.04 ( 0.00, 0.07)	0.048	0.267	0.049	1
PC(17:0/20:3)	Phosphatidylcholine	0.04 ( 0.00, 0.07)	0.027	0.211	0.039	1
PC(37:4)	Phosphatidylcholine	0.04 ( 0.00, 0.08)	0.026	0.205	0.037	1
PC(37:5)	Phosphatidylcholine	0.04 ( 0.00, 0.08)	0.033	0.224	0.041	1
PC(42:5)	Phosphatidylcholine	-0.04 (-0.07,-0.01)	0.024	0.199	0.036	1
PC(p-14:0/20:3)/PC(o-14:0/20:3)	Ether-phosphatidylcholine	0.04 ( 0.00, 0.07)	0.036	0.232	0.042	1
PC(p-14:0/20:4)/PC(o-14:0/20:4)	Ether-phosphatidylcholine	0.05 ( 0.01, 0.08)	0.007	0.112	0.02	1
PC(p-14:0/22:3)/PC(o-14:0/22:3)	Ether-phosphatidylcholine	0.05 ( 0.01, 0.08)	0.007	0.112	0.02	1
PC(p-16:0/20:5)/PC(o-16:0/20:5)	Ether-phosphatidylcholine	0.08 ( 0.05, 0.12)	<0.001	0.001	<0.001	0.003
PC(p-16:0/22:5)/PC(o-16:1/22:5)	Ether-phosphatidylcholine	0.06 ( 0.02, 0.10)	0.002	0.059	0.011	0.897
PC(p-16:0/22:6)/PC(o-16:0/22:6)	Ether-phosphatidylcholine	0.04 ( 0.00, 0.07)	0.037	0.237	0.043	1
PC(p-16:0/22:6)/PC(o-16:1/22:6)	Ether-phosphatidylcholine	0.06 ( 0.02, 0.09)	0.001	0.044	0.008	0.596
PC(p-18:0/20:4)/PC(o-18:1/20:4)	Ether-phosphatidylcholine	0.05 ( 0.01, 0.08)	0.007	0.112	0.02	1
PC(p-18:0/22:4)/PC(o-18:0/22:4)	Ether-phosphatidylcholine	0.04 ( 0.01, 0.07)	0.022	0.19	0.035	1
PC(p-18:1/20:4)/PC(o-18:2/20:4)	Ether-phosphatidylcholine	0.05 ( 0.01, 0.08)	0.01	0.131	0.024	1
PC(p-18:1/26:2)/PC(o-18:2/26:2)	Ether-phosphatidylcholine	0.04 ( 0.01, 0.08)	0.022	0.19	0.035	1
PC(p-18:2/17:0)/PC(o-18:3/17:0)	Ether-phosphatidylcholine	0.04 ( 0.01, 0.08)	0.02	0.185	0.034	1
PC(p-22:2/18:5)/PC(o-22:3/18:5)	Ether-phosphatidylcholine	0.04 ( 0.01, 0.08)	0.022	0.19	0.035	1
PC(p-22:3/18:5)/PC(o-22:4/18:5)	Ether-phosphatidylcholine	0.08 ( 0.04, 0.12)	<0.001	0.001	<0.001	0.006
PC(p-34:2)/PC(o-34:3)	Ether-phosphatidylcholine	0.06 ( 0.02, 0.09)	0.003	0.075	0.014	1
PC(p-36:1)/PC(o-36:2) A	Ether-phosphatidylcholine	0.04 ( 0.00, 0.07)	0.045	0.257	0.047	1
PC(p-36:1)/PC(o-36:2) B	Ether-phosphatidylcholine	0.05 ( 0.01, 0.08)	0.013	0.144	0.026	1
PC(p-36:2)/PC(o-36:3)	Ether-phosphatidylcholine	0.06 ( 0.02, 0.09)	0.002	0.065	0.012	1
PC(p-36:3)/PC(o-36:4)	Ether-phosphatidylcholine	0.07 ( 0.03, 0.10)	<0.001	0.013	0.002	0.132
PC(p-36:4)/PC(o-36:5)	Ether-phosphatidylcholine	0.09 ( 0.05, 0.13)	<0.001	0.001	<0.001	0.002
PC(p-36:5)/PC(o-36:6)	Ether-phosphatidylcholine	0.08 ( 0.05, 0.12)	<0.001	0.001	<0.001	0.006
PC(p-38:2)/PC(o-38:3)	Ether-phosphatidylcholine	0.05 ( 0.01, 0.08)	0.009	0.12	0.022	1
PC(p-38:3)/PC(o-38:4) B	Ether-phosphatidylcholine	0.06 ( 0.02, 0.09)	0.002	0.07	0.013	1
PC(p-38:4)/PC(o-38:5) A	Ether-phosphatidylcholine	0.05 ( 0.02, 0.09)	0.004	0.084	0.015	1
PC(p-38:4)/PC(o-38:5) B	Ether-phosphatidylcholine	0.10 ( 0.06, 0.14)	<0.001	<0.001	<0.001	<0.001
PC(p-38:5)/PC(o-38:6) B	Ether-phosphatidylcholine	0.07 ( 0.04, 0.11)	<0.001	0.006	0.001	0.041
PC(p-38:6)/PC(o-38:7)	Ether-phosphatidylcholine	0.06 ( 0.02, 0.10)	0.001	0.04	0.007	0.529
PC(p-40:3)/PC(o-40:4)	Ether-phosphatidylcholine	0.05 ( 0.02, 0.09)	0.003	0.074	0.013	1
PC(p-40:4)/PC(o-40:5)	Ether-phosphatidylcholine	0.04 ( 0.00, 0.07)	0.033	0.224	0.041	1
PC(p-40:6)/PC(o-40:7) B	Ether-phosphatidylcholine	0.07 ( 0.03, 0.10)	<0.001	0.018	0.003	0.202
PC(p-42:3)/PC(o-42:4)	Ether-phosphatidylcholine	0.05 ( 0.02, 0.09)	0.003	0.074	0.013	1
PC(p-42:4)/PC(o-42:5)	Ether-phosphatidylcholine	0.04 ( 0.00, 0.07)	0.034	0.224	0.041	1
PC(p-42:5)/PC(o-42:6) A	Ether-phosphatidylcholine	0.04 ( 0.01, 0.08)	0.017	0.166	0.03	1
PC(p-42:5)/PC(o-42:6) B	Ether-phosphatidylcholine	0.05 ( 0.01, 0.08)	0.008	0.114	0.021	1
PC(p-44:4)/PC(o-44:5)	Ether-phosphatidylcholine	0.05 ( 0.02, 0.09)	0.003	0.083	0.015	1
PC(p-44:5)/PC(o-44:6)	Ether-phosphatidylcholine	0.05 ( 0.01, 0.08)	0.007	0.112	0.02	1
PE(18:2/18:2)	Phosphatidylethanolamine	-0.04 (-0.07, 0.00)	0.038	0.238	0.043	1
PE(36:4e)/PE(16:0e/20:4)	Phosphatidylethanolamine	0.04 ( 0.00, 0.07)	0.03	0.223	0.041	1
PE(p-18:0/20:5)/PE(o-18:1/20:5)	Ether-phosphatidylethanolamine	0.05 ( 0.02, 0.09)	0.004	0.083	0.015	1
PE(p-36:1)/PE(o-36:2) A	Ether-phosphatidylethanolamine	0.04 ( 0.00, 0.07)	0.047	0.263	0.048	1
PE(p-36:1)/PE(o-36:2) B	Ether-phosphatidylethanolamine	0.05 ( 0.02, 0.09)	0.005	0.103	0.019	1
PE(p-36:4)/PE(o-36:5) A	Ether-phosphatidylethanolamine	0.05 ( 0.01, 0.08)	0.012	0.141	0.026	1
PE(p-36:4)/PE(o-36:5) B	Ether-phosphatidylethanolamine	0.06 ( 0.02, 0.09)	0.002	0.069	0.013	1
PE(p-38:3)/PE(o-38:4)	Ether-phosphatidylethanolamine	0.04 ( 0.00, 0.07)	0.04	0.247	0.045	1
PE(p-38:4)/PE(o-38:5)	Ether-phosphatidylethanolamine	0.08 ( 0.05, 0.12)	<0.001	0.001	<0.001	0.003
PE(p-38:5)/PE(o-38:6) A	Ether-phosphatidylethanolamine	0.06 ( 0.03, 0.10)	0.001	0.032	0.006	0.374
PE(p-38:5)/PE(o-38:6) B	Ether-phosphatidylethanolamine	0.07 ( 0.03, 0.10)	<0.001	0.013	0.002	0.139
PE(p-40:5)/PE(o-40:6) B	Ether-phosphatidylethanolamine	0.05 ( 0.02, 0.09)	0.006	0.106	0.019	1
SM(d14:1/29:0) A	Sphingomyelin	0.05 ( 0.01, 0.08)	0.01	0.131	0.024	1
SM(d17:0/18:2) A	Sphingomyelin	0.04 ( 0.00, 0.07)	0.041	0.248	0.045	1
SM(d17:0/18:2) B	Sphingomyelin	0.04 ( 0.00, 0.07)	0.047	0.264	0.048	1
SM(d37:1) A	Sphingomyelin	0.05 ( 0.02, 0.09)	0.004	0.083	0.015	1
SM(d37:1) B	Sphingomyelin	0.05 ( 0.01, 0.09)	0.006	0.107	0.019	1
SM(d38:1) A	Sphingomyelin	0.04 ( 0.01, 0.08)	0.015	0.159	0.029	1
SM(d39:1) A	Sphingomyelin	0.05 ( 0.02, 0.09)	0.004	0.087	0.016	1
SM(d39:1) B	Sphingomyelin	0.05 ( 0.01, 0.09)	0.012	0.14	0.026	1
SM(d40:1) A	Sphingomyelin	0.04 ( 0.00, 0.07)	0.047	0.263	0.048	1
SM(d41:1) A	Sphingomyelin	0.07 ( 0.03, 0.10)	<0.001	0.013	0.002	0.144
SM(d41:2)	Sphingomyelin	0.05 ( 0.01, 0.08)	0.015	0.155	0.028	1
SM(d41:2) A	Sphingomyelin	0.05 ( 0.01, 0.08)	0.008	0.114	0.021	1
SM(d41:2) B	Sphingomyelin	0.05 ( 0.01, 0.09)	0.01	0.131	0.024	1
SM(d42:1) B	Sphingomyelin	0.04 ( 0.00, 0.07)	0.049	0.268	0.049	1
SM(d43:1) A	Sphingomyelin	0.05 ( 0.01, 0.09)	0.006	0.109	0.02	1
SM(d43:1) B	Sphingomyelin	0.04 ( 0.00, 0.08)	0.029	0.22	0.04	1
SM(d43:2) A	Sphingomyelin	0.04 ( 0.01, 0.08)	0.018	0.17	0.031	1
TAG(40:0)	Triacylglycerol	-0.05 (-0.08,-0.02)	0.004	0.083	0.015	1
TAG(42:0)	Triacylglycerol	-0.04 (-0.07, 0.00)	0.036	0.23	0.042	1
TAG(42:1)	Triacylglycerol	-0.05 (-0.08,-0.01)	0.005	0.103	0.019	1
TAG(42:2)	Triacylglycerol	-0.05 (-0.09,-0.02)	0.004	0.084	0.015	1
TAG(46:4) A	Triacylglycerol	-0.04 (-0.07, 0.00)	0.029	0.22	0.04	1
TAG(54:2)	Triacylglycerol	-0.04 (-0.08,-0.01)	0.02	0.183	0.033	1
TAG(54:3)	Triacylglycerol	-0.05 (-0.09,-0.02)	0.003	0.083	0.015	1
TAG(54:4)/TAG(18:1/18:1/18:2)	Triacylglycerol	-0.04 (-0.08,-0.01)	0.02	0.183	0.033	1
TAG(54:6)/TAG(16:0/18:2/20:4)	Triacylglycerol	0.05 ( 0.02, 0.09)	0.002	0.069	0.013	1
TAG(56:3)	Triacylglycerol	-0.05 (-0.08,-0.01)	0.016	0.159	0.029	1
Unknown_1001	Unknown	-0.05 (-0.08,-0.01)	0.008	0.114	0.021	1
Unknown_1003	Unknown	-0.04 (-0.07, 0.00)	0.032	0.224	0.041	1
Unknown_1006	Unknown	-0.04 (-0.07, 0.00)	0.03	0.22	0.04	1
Unknown_1023	Unknown	0.05 ( 0.01, 0.08)	0.008	0.114	0.021	1
Unknown_1024	Unknown	0.04 ( 0.00, 0.08)	0.033	0.224	0.041	1
Unknown_1025	Unknown	0.04 ( 0.00, 0.07)	0.038	0.238	0.043	1
Unknown_1029	Unknown	0.05 ( 0.02, 0.09)	0.004	0.083	0.015	1
Unknown_1030	Unknown	0.08 ( 0.05, 0.12)	<0.001	0.001	<0.001	0.005
Unknown_1034	Unknown	0.05 ( 0.02, 0.09)	0.003	0.082	0.015	1
Unknown_1049	Unknown	0.04 ( 0.01, 0.08)	0.022	0.191	0.035	1
Unknown_1050	Unknown	-0.05 (-0.08,-0.01)	0.006	0.109	0.02	1
Unknown_1052	Unknown	-0.05 (-0.08,-0.01)	0.01	0.131	0.024	1
Unknown_1055	Unknown	0.07 ( 0.03, 0.10)	<0.001	0.013	0.002	0.144
Unknown_1056	Unknown	0.06 ( 0.02, 0.09)	0.002	0.064	0.012	0.993
Unknown_1064	Unknown	0.08 ( 0.04, 0.11)	<0.001	0.005	0.001	0.027
Unknown_1065	Unknown	-0.04 (-0.07, 0.00)	0.031	0.223	0.041	1
Unknown_1066	Unknown	0.05 ( 0.01, 0.08)	0.008	0.114	0.021	1
Unknown_1068	Unknown	0.07 ( 0.03, 0.11)	<0.001	0.009	0.002	0.072
Unknown_1077	Unknown	0.05 ( 0.02, 0.09)	0.004	0.083	0.015	1
Unknown_1096	Unknown	0.04 ( 0.01, 0.08)	0.022	0.19	0.035	1
Unknown_1097	Unknown	0.06 ( 0.02, 0.09)	0.003	0.074	0.013	1
Unknown_1098	Unknown	0.04 ( 0.01, 0.08)	0.019	0.176	0.032	1
Unknown_1113	Unknown	0.04 ( 0.01, 0.08)	0.024	0.199	0.036	1
Unknown_1125	Unknown	-0.04 (-0.08,-0.01)	0.014	0.152	0.028	1
Unknown_1133	Unknown	-0.04 (-0.08, 0.00)	0.026	0.205	0.037	1
Unknown_1142	Unknown	0.04 ( 0.00, 0.07)	0.03	0.22	0.04	1
Unknown_1146	Unknown	0.04 ( 0.01, 0.08)	0.014	0.15	0.027	1
Unknown_1153	Unknown	0.04 ( 0.00, 0.08)	0.034	0.224	0.041	1
Unknown_1160	Unknown	0.04 ( 0.00, 0.08)	0.041	0.248	0.045	1
Unknown_1165	Unknown	0.04 ( 0.01, 0.08)	0.014	0.15	0.027	1
Unknown_1166	Unknown	0.04 ( 0.01, 0.08)	0.021	0.19	0.035	1
Unknown_1194	Unknown	0.04 ( 0.00, 0.07)	0.028	0.215	0.039	1
Unknown_1201	Unknown	-0.04 (-0.07, 0.00)	0.044	0.256	0.047	1
Unknown_1207	Unknown	-0.07 (-0.10,-0.03)	<0.001	0.013	0.002	0.142
Unknown_1225	Unknown	0.04 ( 0.01, 0.08)	0.018	0.17	0.031	1
Unknown_132	Unknown	-0.04 (-0.07, 0.00)	0.044	0.256	0.047	1
Unknown_138	Unknown	0.04 ( 0.00, 0.07)	0.032	0.224	0.041	1
Unknown_140	Unknown	-0.05 (-0.08,-0.01)	0.01	0.131	0.024	1
Unknown_149	Unknown	-0.04 (-0.07, 0.00)	0.034	0.224	0.041	1
Unknown_157	Unknown	0.04 ( 0.00, 0.08)	0.039	0.243	0.044	1
Unknown_160	Unknown	0.05 ( 0.01, 0.09)	0.006	0.109	0.02	1
Unknown_161	Unknown	0.06 ( 0.03, 0.10)	0.001	0.037	0.007	0.468
Unknown_169	Unknown	0.09 ( 0.06, 0.13)	<0.001	<0.001	<0.001	<0.001
Unknown_170	Unknown	0.10 ( 0.06, 0.14)	<0.001	<0.001	<0.001	<0.001
Unknown_181	Unknown	0.07 ( 0.04, 0.11)	<0.001	0.006	0.001	0.042
Unknown_182	Unknown	0.04 ( 0.01, 0.08)	0.014	0.152	0.028	1
Unknown_196	Unknown	0.07 ( 0.03, 0.11)	<0.001	0.01	0.002	0.087
Unknown_202	Unknown	-0.04 (-0.07, 0.00)	0.029	0.22	0.04	1
Unknown_210	Unknown	0.05 ( 0.02, 0.09)	0.003	0.074	0.013	1
Unknown_212	Unknown	0.04 ( 0.01, 0.08)	0.017	0.167	0.03	1
Unknown_213	Unknown	0.04 ( 0.00, 0.08)	0.036	0.232	0.042	1
Unknown_219	Unknown	-0.05 (-0.08,-0.01)	0.013	0.143	0.026	1
Unknown_227	Unknown	0.04 ( 0.01, 0.08)	0.025	0.202	0.037	1
Unknown_230	Unknown	0.06 ( 0.02, 0.09)	0.002	0.059	0.011	0.836
Unknown_232	Unknown	0.04 ( 0.01, 0.08)	0.014	0.152	0.028	1
Unknown_253	Unknown	0.07 ( 0.04, 0.10)	<0.001	0.006	0.001	0.039
Unknown_258	Unknown	0.05 ( 0.02, 0.09)	0.004	0.084	0.015	1
Unknown_259	Unknown	0.04 ( 0.00, 0.07)	0.035	0.227	0.041	1
Unknown_260	Unknown	0.05 ( 0.01, 0.08)	0.01	0.131	0.024	1
Unknown_272	Unknown	0.07 ( 0.04, 0.11)	<0.001	0.006	0.001	0.049
Unknown_274	Unknown	0.05 ( 0.01, 0.08)	0.012	0.14	0.026	1
Unknown_275	Unknown	0.04 ( 0.01, 0.08)	0.024	0.197	0.036	1
Unknown_276	Unknown	0.04 ( 0.00, 0.07)	0.039	0.244	0.044	1
Unknown_289	Unknown	0.11 ( 0.08, 0.15)	<0.001	<0.001	<0.001	<0.001
Unknown_290	Unknown	0.04 ( 0.01, 0.08)	0.016	0.16	0.029	1
Unknown_291	Unknown	0.08 ( 0.05, 0.11)	<0.001	0.001	<0.001	0.002
Unknown_294	Unknown	0.05 ( 0.01, 0.09)	0.017	0.167	0.03	1
Unknown_295	Unknown	0.05 ( 0.01, 0.09)	0.017	0.164	0.03	1
Unknown_296	Unknown	0.04 ( 0.00, 0.08)	0.046	0.263	0.048	1
Unknown_30	Unknown	-0.04 (-0.07, 0.00)	0.034	0.224	0.041	1
Unknown_336	Unknown	0.05 ( 0.01, 0.08)	0.009	0.127	0.023	1
Unknown_337	Unknown	0.05 ( 0.01, 0.08)	0.008	0.114	0.021	1
Unknown_353	Unknown	-0.04 (-0.07, 0.00)	0.033	0.224	0.041	1
Unknown_382	Unknown	-0.04 (-0.07, 0.00)	0.045	0.258	0.047	1
Unknown_401	Unknown	0.04 ( 0.01, 0.08)	0.025	0.202	0.037	1
Unknown_402	Unknown	0.05 ( 0.02, 0.09)	0.004	0.083	0.015	1
Unknown_403	Unknown	0.05 ( 0.02, 0.09)	0.004	0.083	0.015	1
Unknown_406	Unknown	-0.04 (-0.07, 0.00)	0.044	0.256	0.047	1
Unknown_407	Unknown	-0.04 (-0.08, 0.00)	0.031	0.223	0.041	1
Unknown_408	Unknown	-0.04 (-0.07, 0.00)	0.044	0.256	0.047	1
Unknown_409	Unknown	-0.04 (-0.08,-0.01)	0.018	0.168	0.031	1
Unknown_416	Unknown	-0.04 (-0.08, 0.00)	0.042	0.248	0.045	1
Unknown_417	Unknown	-0.04 (-0.08,-0.01)	0.016	0.159	0.029	1
Unknown_419	Unknown	0.06 ( 0.02, 0.10)	0.002	0.059	0.011	0.867
Unknown_429	Unknown	0.06 ( 0.02, 0.09)	0.003	0.074	0.013	1
Unknown_430	Unknown	0.05 ( 0.01, 0.08)	0.011	0.132	0.024	1
Unknown_431	Unknown	0.04 ( 0.00, 0.07)	0.037	0.237	0.043	1
Unknown_433	Unknown	0.04 ( 0.00, 0.07)	0.026	0.205	0.037	1
Unknown_437	Unknown	0.04 ( 0.00, 0.08)	0.044	0.256	0.047	1
Unknown_438	Unknown	0.05 ( 0.01, 0.09)	0.008	0.114	0.021	1
Unknown_439	Unknown	0.04 ( 0.00, 0.07)	0.032	0.224	0.041	1
Unknown_451	Unknown	0.04 ( 0.00, 0.07)	0.049	0.27	0.049	1
Unknown_453	Unknown	0.04 ( 0.00, 0.08)	0.041	0.248	0.045	1
Unknown_465	Unknown	0.04 ( 0.00, 0.07)	0.04	0.246	0.045	1
Unknown_479	Unknown	0.04 ( 0.00, 0.07)	0.043	0.256	0.047	1
Unknown_546	Unknown	-0.04 (-0.07, 0.00)	0.034	0.224	0.041	1
Unknown_582	Unknown	-0.05 (-0.08,-0.01)	0.011	0.131	0.024	1
Unknown_587	Unknown	0.04 ( 0.01, 0.08)	0.018	0.17	0.031	1
Unknown_593	Unknown	0.05 ( 0.01, 0.08)	0.01	0.131	0.024	1
Unknown_60	Unknown	0.04 ( 0.00, 0.07)	0.027	0.21	0.038	1
Unknown_624	Unknown	0.05 ( 0.01, 0.08)	0.009	0.12	0.022	1
Unknown_636	Unknown	-0.05 (-0.08,-0.01)	0.006	0.107	0.019	1
Unknown_741	Unknown	-0.04 (-0.08,-0.01)	0.022	0.19	0.035	1
Unknown_831	Unknown	-0.05 (-0.08,-0.01)	0.011	0.131	0.024	1
Unknown_850	Unknown	-0.04 (-0.08,-0.01)	0.016	0.159	0.029	1
Unknown_875	Unknown	0.04 ( 0.01, 0.08)	0.013	0.143	0.026	1
Unknown_885	Unknown	-0.04 (-0.07, 0.00)	0.047	0.263	0.048	1
Unknown_887	Unknown	0.04 ( 0.00, 0.07)	0.028	0.216	0.039	1
Unknown_893	Unknown	-0.05 (-0.08,-0.01)	0.007	0.114	0.021	1
Unknown_912	Unknown	-0.04 (-0.07, 0.00)	0.032	0.224	0.041	1
Unknown_920	Unknown	0.04 ( 0.00, 0.08)	0.033	0.224	0.041	1
Unknown_97	Unknown	-0.04 (-0.07, 0.00)	0.033	0.224	0.041	1
Unknown_979	Unknown	-0.04 (-0.08,-0.01)	0.023	0.194	0.035	1
Processed meat-related lipids
CE(20:5)	Cholesterol ester	-0.05 (-0.08,-0.02)	0.005	0.149	0.015	1
CE(22:5) A	Cholesterol ester	0.06 ( 0.03, 0.10)	<0.001	0.033	0.003	0.127
CE(22:5) B	Cholesterol ester	0.05 ( 0.01, 0.08)	0.007	0.177	0.018	1
LPC(14:0)	Lysophosphatidylcholine	-0.03 (-0.07, 0.00)	0.044	0.469	0.048	1
LPC(20:5)	Lysophosphatidylcholine	-0.06 (-0.09,-0.02)	0.002	0.091	0.009	0.927
LPC(24:0)	Lysophosphatidylcholine	-0.06 (-0.09,-0.02)	0.002	0.09	0.009	0.819
LPE(20:3)	Lysophosphatidylethanolamine	-0.04 (-0.08,-0.01)	0.019	0.305	0.031	1
PC(28:0)	Phosphatidylcholine	-0.05 (-0.08,-0.02)	0.005	0.149	0.015	1
PC(30:0)	Phosphatidylcholine	-0.04 (-0.08,-0.01)	0.015	0.267	0.027	1
PC(31:0)	Phosphatidylcholine	-0.04 (-0.08,-0.01)	0.012	0.234	0.024	1
PC(32:2)	Phosphatidylcholine	-0.04 (-0.08,-0.01)	0.02	0.306	0.031	1
PC(32:3)	Phosphatidylcholine	-0.04 (-0.07,-0.01)	0.024	0.329	0.034	1
PC(34:3) B	Phosphatidylcholine	-0.05 (-0.08,-0.01)	0.009	0.2	0.021	1
PC(34:3) C	Phosphatidylcholine	-0.04 (-0.07, 0.00)	0.044	0.469	0.048	1
PC(34:4)	Phosphatidylcholine	-0.04 (-0.07, 0.00)	0.047	0.476	0.049	1
PC(35:4)	Phosphatidylcholine	-0.04 (-0.07, 0.00)	0.038	0.422	0.043	1
PC(36:4) A	Phosphatidylcholine	-0.04 (-0.07, 0.00)	0.031	0.372	0.038	1
PC(36:5) A	Phosphatidylcholine	-0.04 (-0.07, 0.00)	0.025	0.335	0.034	1
PC(36:5) B	Phosphatidylcholine	-0.05 (-0.08,-0.01)	0.005	0.154	0.016	1
PC(36:5) D	Phosphatidylcholine	-0.05 (-0.09,-0.02)	0.002	0.101	0.01	1
PC(36:6)	Phosphatidylcholine	-0.04 (-0.08,-0.01)	0.02	0.309	0.032	1
PC(37:5)	Phosphatidylcholine	-0.04 (-0.08,-0.01)	0.016	0.27	0.028	1
PC(38:5) A	Phosphatidylcholine	-0.04 (-0.07, 0.00)	0.044	0.469	0.048	1
PC(38:6) A	Phosphatidylcholine	-0.05 (-0.09,-0.01)	0.006	0.163	0.017	1
PC(38:7)	Phosphatidylcholine	-0.04 (-0.07, 0.00)	0.041	0.453	0.046	1
PC(40:5) B	Phosphatidylcholine	0.04 ( 0.01, 0.08)	0.023	0.326	0.033	1
PC(40:6) A	Phosphatidylcholine	-0.06 (-0.10,-0.03)	0.001	0.059	0.006	0.382
PC(40:7) A	Phosphatidylcholine	0.06 ( 0.03, 0.09)	0.001	0.052	0.005	0.289
PC(p-14:0/16:0)/PC(o-14:0/16:0)	Ether-phosphatidylcholine	-0.07 (-0.11,-0.04)	<0.001	0.011	0.001	0.019
PC(p-16:0/20:5)/PC(o-16:0/20:5)	Ether-phosphatidylcholine	-0.04 (-0.08,-0.01)	0.015	0.263	0.027	1
PC(p-16:0/22:6)/PC(o-16:1/22:6)	Ether-phosphatidylcholine	-0.04 (-0.07, 0.00)	0.03	0.372	0.038	1
PC(p-16:1/24:4)/PC(o-16:2/24:4)	Ether-phosphatidylcholine	-0.05 (-0.09,-0.02)	0.002	0.101	0.01	1
PC(p-16:1/26:2)/PC(o-16:2/26:2)	Ether-phosphatidylcholine	-0.04 (-0.08,-0.01)	0.014	0.249	0.026	1
PC(p-36:5)/PC(o-36:6)	Ether-phosphatidylcholine	-0.04 (-0.08,-0.01)	0.019	0.305	0.031	1
PC(p-42:5)/PC(o-42:6) A	Ether-phosphatidylcholine	-0.04 (-0.08,-0.01)	0.022	0.322	0.033	1
PE(p-18:0/22:5)/PE(o-18:1/22:5)	Ether-phosphatidylethanolamine	0.05 ( 0.01, 0.08)	0.006	0.158	0.016	1
SM(d14:1/29:0) A	Sphingomyelin	-0.04 (-0.07, 0.00)	0.034	0.394	0.04	1
SM(d15:0/16:1)	Sphingomyelin	-0.06 (-0.10,-0.03)	0.001	0.052	0.005	0.279
SM(d17:0/18:2) A	Sphingomyelin	-0.04 (-0.07, 0.00)	0.026	0.338	0.035	1
SM(d30:1) A	Sphingomyelin	-0.10 (-0.13,-0.06)	<0.001	<0.001	<0.001	<0.001
SM(d30:1) B	Sphingomyelin	-0.08 (-0.12,-0.05)	<0.001	0.002	<0.001	0.002
SM(d32:1) A	Sphingomyelin	-0.06 (-0.09,-0.02)	0.002	0.09	0.009	0.824
SM(d32:1) B	Sphingomyelin	-0.04 (-0.08,-0.01)	0.012	0.234	0.024	1
SM(d32:2) A	Sphingomyelin	-0.07 (-0.11,-0.03)	<0.001	0.022	0.002	0.068
SM(d32:2) B	Sphingomyelin	-0.07 (-0.11,-0.03)	<0.001	0.033	0.003	0.141
SM(d34:0) B	Sphingomyelin	0.04 ( 0.01, 0.08)	0.018	0.296	0.03	1
SM(d34:1) B	Sphingomyelin	0.04 ( 0.01, 0.07)	0.023	0.326	0.033	1
SM(d36:0) B	Sphingomyelin	0.04 ( 0.01, 0.08)	0.024	0.329	0.034	1
SM(d36:3) A	Sphingomyelin	-0.04 (-0.08,-0.01)	0.019	0.305	0.031	1
SM(d39:1) A	Sphingomyelin	-0.05 (-0.09,-0.02)	0.005	0.154	0.016	1
SM(d39:1) B	Sphingomyelin	-0.06 (-0.09,-0.02)	0.002	0.101	0.01	1
SM(d40:2) B	Sphingomyelin	-0.04 (-0.08,-0.01)	0.02	0.307	0.031	1
SM(d41:2)	Sphingomyelin	-0.04 (-0.07, 0.00)	0.046	0.475	0.049	1
SM(d41:2) B	Sphingomyelin	-0.05 (-0.08,-0.01)	0.013	0.241	0.025	1
SM(d42:2)	Sphingomyelin	0.06 ( 0.03, 0.10)	<0.001	0.048	0.005	0.228
SM(d42:2) A	Sphingomyelin	0.07 ( 0.04, 0.10)	<0.001	0.018	0.002	0.037
SM(d43:1) A	Sphingomyelin	-0.04 (-0.08,-0.01)	0.02	0.307	0.031	1
SM(d44:2) B	Sphingomyelin	0.05 ( 0.01, 0.08)	0.007	0.177	0.018	1
Unknown_10	Unknown	0.03 ( 0.00, 0.07)	0.046	0.475	0.049	1
Unknown_1025	Unknown	0.05 ( 0.02, 0.09)	0.004	0.129	0.013	1
Unknown_1032	Unknown	0.04 ( 0.00, 0.07)	0.027	0.343	0.035	1
Unknown_1034	Unknown	0.05 ( 0.02, 0.09)	0.004	0.129	0.013	1
Unknown_1098	Unknown	0.04 ( 0.01, 0.08)	0.013	0.241	0.025	1
Unknown_1112	Unknown	0.04 ( 0.01, 0.08)	0.014	0.249	0.026	1
Unknown_1114	Unknown	0.06 ( 0.02, 0.09)	0.001	0.084	0.009	0.714
Unknown_1126	Unknown	0.04 ( 0.00, 0.07)	0.028	0.351	0.036	1
Unknown_1146	Unknown	0.05 ( 0.02, 0.08)	0.005	0.149	0.015	1
Unknown_1150	Unknown	-0.04 (-0.07, 0.00)	0.048	0.477	0.049	1
Unknown_1151	Unknown	-0.04 (-0.08,-0.01)	0.012	0.234	0.024	1
Unknown_1152	Unknown	-0.06 (-0.09,-0.02)	0.002	0.091	0.009	0.904
Unknown_1153	Unknown	-0.04 (-0.08,-0.01)	0.025	0.333	0.034	1
Unknown_1159	Unknown	-0.04 (-0.07, 0.00)	0.033	0.389	0.04	1
Unknown_1165	Unknown	0.06 ( 0.02, 0.09)	0.001	0.065	0.007	0.508
Unknown_1168	Unknown	0.06 ( 0.02, 0.09)	0.001	0.059	0.006	0.375
Unknown_117	Unknown	0.04 ( 0.00, 0.07)	0.046	0.475	0.049	1
Unknown_1173	Unknown	0.07 ( 0.04, 0.11)	<0.001	0.011	0.001	0.015
Unknown_1174	Unknown	0.06 ( 0.03, 0.10)	<0.001	0.033	0.003	0.147
Unknown_1177	Unknown	0.08 ( 0.05, 0.12)	<0.001	0.002	<0.001	0.001
Unknown_1178	Unknown	0.06 ( 0.02, 0.09)	0.001	0.065	0.007	0.484
Unknown_1179	Unknown	0.07 ( 0.03, 0.10)	<0.001	0.021	0.002	0.056
Unknown_118	Unknown	0.03 ( 0.00, 0.07)	0.048	0.477	0.049	1
Unknown_1180	Unknown	0.06 ( 0.02, 0.09)	0.001	0.077	0.008	0.623
Unknown_1187	Unknown	0.06 ( 0.03, 0.09)	0.001	0.052	0.005	0.297
Unknown_1194	Unknown	0.04 ( 0.01, 0.08)	0.011	0.234	0.024	1
Unknown_12	Unknown	-0.05 (-0.08,-0.02)	0.005	0.149	0.015	1
Unknown_123	Unknown	0.04 ( 0.01, 0.08)	0.016	0.275	0.028	1
Unknown_138	Unknown	-0.07 (-0.10,-0.03)	<0.001	0.02	0.002	0.047
Unknown_142	Unknown	-0.04 (-0.07, 0.00)	0.025	0.335	0.034	1
Unknown_183	Unknown	0.04 ( 0.00, 0.07)	0.031	0.372	0.038	1
Unknown_197	Unknown	0.05 ( 0.02, 0.09)	0.004	0.145	0.015	1
Unknown_219	Unknown	0.05 ( 0.02, 0.09)	0.002	0.101	0.01	1
Unknown_242	Unknown	0.04 ( 0.01, 0.08)	0.012	0.234	0.024	1
Unknown_247	Unknown	-0.04 (-0.07, 0.00)	0.042	0.461	0.047	1
Unknown_258	Unknown	0.04 ( 0.01, 0.08)	0.011	0.234	0.024	1
Unknown_260	Unknown	-0.05 (-0.08,-0.01)	0.012	0.234	0.024	1
Unknown_261	Unknown	0.06 ( 0.02, 0.09)	0.002	0.091	0.009	0.878
Unknown_262	Unknown	0.06 ( 0.03, 0.10)	<0.001	0.033	0.003	0.135
Unknown_263	Unknown	0.05 ( 0.02, 0.09)	0.003	0.119	0.012	1
Unknown_270	Unknown	0.04 ( 0.00, 0.07)	0.038	0.422	0.043	1
Unknown_285	Unknown	-0.04 (-0.08,-0.01)	0.018	0.296	0.03	1
Unknown_343	Unknown	0.05 ( 0.01, 0.08)	0.01	0.213	0.022	1
Unknown_429	Unknown	0.06 ( 0.02, 0.09)	0.001	0.065	0.007	0.51
Unknown_467	Unknown	0.04 ( 0.01, 0.08)	0.013	0.241	0.025	1
Unknown_468	Unknown	0.04 ( 0.00, 0.07)	0.048	0.477	0.049	1
Unknown_48	Unknown	-0.04 (-0.08,-0.01)	0.012	0.234	0.024	1
Unknown_489	Unknown	-0.04 (-0.07,-0.01)	0.023	0.329	0.034	1
Unknown_49	Unknown	-0.04 (-0.07, 0.00)	0.032	0.377	0.039	1
Unknown_50	Unknown	-0.04 (-0.08,-0.01)	0.013	0.241	0.025	1
Unknown_536	Unknown	0.04 ( 0.00, 0.07)	0.039	0.438	0.045	1
Unknown_554	Unknown	0.05 ( 0.01, 0.08)	0.005	0.154	0.016	1
Unknown_565	Unknown	-0.05 (-0.08,-0.02)	0.003	0.128	0.013	1
Unknown_573	Unknown	0.04 ( 0.00, 0.07)	0.034	0.394	0.04	1
Unknown_587	Unknown	0.04 ( 0.00, 0.07)	0.029	0.352	0.036	1
Unknown_596	Unknown	0.05 ( 0.01, 0.08)	0.006	0.156	0.016	1
Unknown_597	Unknown	-0.05 (-0.08,-0.01)	0.005	0.154	0.016	1
Unknown_6	Unknown	0.05 ( 0.01, 0.08)	0.006	0.163	0.017	1
Unknown_604	Unknown	-0.05 (-0.08,-0.01)	0.005	0.154	0.016	1
Unknown_61	Unknown	-0.05 (-0.08,-0.01)	0.008	0.184	0.019	1
Unknown_62	Unknown	-0.03 (-0.07, 0.00)	0.041	0.451	0.046	1
Unknown_635	Unknown	-0.05 (-0.08,-0.01)	0.007	0.183	0.019	1
Unknown_64	Unknown	-0.04 (-0.07, 0.00)	0.027	0.343	0.035	1
Unknown_640	Unknown	-0.05 (-0.08,-0.02)	0.004	0.129	0.013	1
Unknown_654	Unknown	-0.05 (-0.08,-0.01)	0.007	0.177	0.018	1
Unknown_66	Unknown	-0.05 (-0.09,-0.02)	0.003	0.126	0.013	1
Unknown_67	Unknown	-0.04 (-0.07, 0.00)	0.026	0.343	0.035	1
Unknown_68	Unknown	-0.04 (-0.08,-0.01)	0.022	0.322	0.033	1
Unknown_683	Unknown	-0.04 (-0.07, 0.00)	0.045	0.475	0.049	1
Unknown_70	Unknown	-0.04 (-0.08,-0.01)	0.018	0.296	0.03	1
Unknown_71	Unknown	-0.04 (-0.07, 0.00)	0.048	0.477	0.049	1
Unknown_74	Unknown	-0.03 (-0.07, 0.00)	0.049	0.479	0.049	1
Unknown_745	Unknown	0.05 ( 0.02, 0.09)	0.003	0.115	0.012	1
Unknown_79	Unknown	0.05 ( 0.01, 0.08)	0.008	0.184	0.019	1
Unknown_80	Unknown	0.04 ( 0.01, 0.07)	0.019	0.305	0.031	1
Unknown_808	Unknown	0.04 ( 0.00, 0.07)	0.036	0.414	0.042	1
Unknown_831	Unknown	0.05 ( 0.01, 0.08)	0.008	0.193	0.02	1
Unknown_84	Unknown	0.06 ( 0.02, 0.09)	0.001	0.065	0.007	0.472
Unknown_846	Unknown	-0.05 (-0.08,-0.01)	0.007	0.178	0.018	1
Unknown_849	Unknown	-0.04 (-0.07,-0.01)	0.021	0.31	0.032	1
Unknown_85	Unknown	0.04 ( 0.01, 0.08)	0.014	0.249	0.026	1
Unknown_852	Unknown	-0.05 (-0.09,-0.02)	0.003	0.108	0.011	1
Unknown_86	Unknown	-0.04 (-0.07,-0.01)	0.023	0.326	0.033	1
Unknown_865	Unknown	0.05 ( 0.01, 0.09)	0.012	0.234	0.024	1
Unknown_873	Unknown	0.04 ( 0.00, 0.07)	0.049	0.479	0.049	1
Unknown_878	Unknown	0.04 ( 0.00, 0.07)	0.027	0.345	0.035	1
Unknown_880	Unknown	-0.04 (-0.07, 0.00)	0.037	0.415	0.043	1
Unknown_885	Unknown	0.04 ( 0.00, 0.07)	0.028	0.35	0.036	1
Unknown_886	Unknown	0.05 ( 0.01, 0.08)	0.009	0.2	0.021	1
Unknown_894	Unknown	0.03 ( 0.00, 0.07)	0.048	0.477	0.049	1
Unknown_898	Unknown	-0.04 (-0.07,-0.01)	0.024	0.333	0.034	1
Unknown_90	Unknown	0.04 ( 0.00, 0.07)	0.027	0.343	0.035	1
Unknown_900	Unknown	0.04 ( 0.00, 0.07)	0.032	0.378	0.039	1
Unknown_912	Unknown	0.05 ( 0.01, 0.08)	0.01	0.213	0.022	1
Unknown_915	Unknown	0.05 ( 0.02, 0.09)	0.003	0.115	0.012	1
Unknown_916	Unknown	0.04 ( 0.01, 0.07)	0.021	0.31	0.032	1
Unknown_940	Unknown	0.04 ( 0.01, 0.08)	0.01	0.215	0.022	1
Unknown_964	Unknown	0.04 ( 0.00, 0.07)	0.031	0.372	0.038	1
Unknown_99	Unknown	0.05 ( 0.02, 0.09)	0.002	0.101	0.01	1
Unknown_996	Unknown	0.04 ( 0.00, 0.07)	0.046	0.475	0.049	1
The letter A or B in the name of lipids indicates isomers.
¹ Beta coefficient of lipids associated with red or processed meat intake. Obtained by mixed-effects linear regression model, adjusting for age, sex, study center, education, BMI, fasting glucose, total energy intake, smoking, alcohol use, physical activity levels, lipid-lowering medication use, and hypertension status. Random effects were used to account for family relatedness.
² Adjusted for multiple testing using the Storey’s q-value method.
3 Adjusted the false discovery rate (FDR) using the Benjamini-Hochberg (BH) method.
4 Adjusting for multiple testing using the number of effective test (Meff) method based on Li and Ji (2005).

## Sheet: suppl_tableS2
Supplemental Table S2. Plasma lipid species associated with red or processed meat intake (q<0.05) and incident T2D
		Association with meat intake		Association with incident T2D
Lipids	Class	Beta (95%CI)1	q2	OR (95%CI)3
Red meat-related lipids
CE(18:0)	Cholesterol ester	0.06 (0.03,0.10)	0.036	1.04 (0.77,1.41)
PC(p-16:0/20:5)/PC(o-16:0/20:5)	Ether-phosphatidylcholine	0.08 (0.05,0.12)	0.001	1.19 (0.92,1.54)
PC(p-16:0/22:6)/PC(o-16:1/22:6)	Ether-phosphatidylcholine	0.06 (0.02,0.09)	0.044	1.00 (0.76,1.32)
PC(p-22:3/18:5)/PC(o-22:4/18:5)	Ether-phosphatidylcholine	0.08 (0.04,0.12)	0.001	0.82 (0.61,1.12)
PC(p-36:3)/PC(o-36:4)	Ether-phosphatidylcholine	0.07 (0.03,0.10)	0.013	1.32 (1.01,1.73)
PC(p-36:4)/PC(o-36:5)	Ether-phosphatidylcholine	0.09 (0.05,0.13)	0.001	1.07 (0.79,1.44)
PC(p-36:5)/PC(o-36:6)	Ether-phosphatidylcholine	0.08 (0.05,0.12)	0.001	1.00 (0.74,1.37)
PC(p-38:4)/PC(o-38:5) B	Ether-phosphatidylcholine	0.10 (0.06,0.14)	<0.001	1.11 (0.82,1.49)
PC(p-38:5)/PC(o-38:6) B	Ether-phosphatidylcholine	0.07 (0.04,0.11)	0.006	1.04 (0.78,1.39)
PC(p-38:6)/PC(o-38:7)	Ether-phosphatidylcholine	0.06 (0.02,0.10)	0.04	1.00 (0.75,1.33)
PC(p-40:6)/PC(o-40:7) B	Ether-phosphatidylcholine	0.07 (0.03,0.10)	0.018	1.02 (0.77,1.36)
PE(p-38:4)/PE(o-38:5)	Ether-phosphatidylethanolamine	0.08 (0.05,0.12)	0.001	1.24 (0.95,1.61)
PE(p-38:5)/PE(o-38:6) A	Ether-phosphatidylethanolamine	0.06 (0.03,0.10)	0.032	1.32 (1.02,1.70)
PE(p-38:5)/PE(o-38:6) B	Ether-phosphatidylethanolamine	0.07 (0.03,0.10)	0.013	1.39 (1.08,1.78)
SM(d41:1) A	Sphingomyelin	0.07 (0.03,0.10)	0.013	1.23 (0.93,1.63)
Processed meat-related lipids
CE(22:5) A	Cholesterol ester	0.06 ( 0.03, 0.10)	0.033	0.99 (0.76,1.30)
PC(p-14:0/16:0)/PC(o-14:0/16:0)	Ether-phosphatidylcholine	-0.07 (-0.11,-0.04)	0.011	0.96 (0.72,1.28)
SM(d30:1) A	Sphingomyelin	-0.10 (-0.13,-0.06)	<0.001	0.83 (0.61,1.13)
SM(d30:1) B	Sphingomyelin	-0.08 (-0.12,-0.05)	0.002	0.89 (0.65,1.20)
SM(d32:2) A	Sphingomyelin	-0.07 (-0.11,-0.03)	0.022	1.05 (0.80,1.38)
SM(d32:2) B	Sphingomyelin	-0.07 (-0.11,-0.03)	0.033	0.86 (0.63,1.17)
SM(d42:2)	Sphingomyelin	0.06 ( 0.03,0.10)	0.048	1.33 (1.02,1.75)
SM(d42:2) A	Sphingomyelin	0.07 ( 0.04,0.10)	0.018	1.36 (1.04,1.80)
The letter A or B in the name of lipids indicates isomers.
1Beta coefficient of lipids associated with red or processed meat intake. Obtained by mixed-effects linear regression model, adjusting for age, sex, study center, education, BMI, fasting glucose, total energy intake, smoking, alcohol use, physical activity levels, lipid-lowering medication use, and hypertension status. Random effects were used to account for family relatedness.
2Adjusted for multiple testing using the Storey’s q-value method.
3Odds ratio of baseline lipids associated with incident type 2 diabetes. Obtained by mixed-effects logistic models, adjusting for all covariates above (baseline level). Boldface indicates statistical significance.

## Sheet: suppl_tableS3
Supplemental Table S3. Lipids associated with both unprocessed red and processed meat intake (P<0.05)
Lipids	Class	Associations with meat intake, beta (95%CI)¹
		Unprocessed red meat	Processed meat
CE(20:5)	Cholesterol ester	0.05 ( 0.01, 0.08)	-0.05 (-0.08,-0.02)
PC(37:5)	Phosphatidylcholine	0.04 ( 0.00, 0.08)	-0.04 (-0.08,-0.01)
PC(p-16:0/20:5)/PC(o-16:0/20:5)	Ether-phosphatidylcholine	0.08 ( 0.05, 0.12)	-0.04 (-0.08,-0.01)
PC(p-16:0/22:6)/PC(o-16:1/22:6)	Ether-phosphatidylcholine	0.06 ( 0.02, 0.09)	-0.04 (-0.07, 0.00)
PC(p-36:5)/PC(o-36:6)	Ether-phosphatidylcholine	0.08 ( 0.05, 0.12)	-0.04 (-0.08,-0.01)
PC(p-42:5)/PC(o-42:6) A	Ether-phosphatidylcholine	0.04 ( 0.01, 0.08)	-0.04 (-0.08,-0.01)
SM(d14:1/29:0) A	Sphingomyelin	0.05 ( 0.01, 0.08)	-0.04 (-0.07, 0.00)
SM(d17:0/18:2) A	Sphingomyelin	0.04 ( 0.00, 0.07)	-0.04 (-0.07, 0.00)
SM(d39:1) A	Sphingomyelin	0.05 ( 0.02, 0.09)	-0.05 (-0.09,-0.02)
SM(d39:1) B	Sphingomyelin	0.05 ( 0.01, 0.09)	-0.06 (-0.09,-0.02)
SM(d41:2)	Sphingomyelin	0.05 ( 0.01, 0.08)	-0.04 (-0.07, 0.00)
SM(d41:2) B	Sphingomyelin	0.05 ( 0.01, 0.09)	-0.05 (-0.08,-0.01)
SM(d43:1) A	Sphingomyelin	0.05 ( 0.01, 0.09)	-0.04 (-0.08,-0.01)
Unknown_1025	Unknown	0.04 ( 0.00, 0.07)	0.05 ( 0.02, 0.09)
Unknown_1034	Unknown	0.05 ( 0.02, 0.09)	0.05 ( 0.02, 0.09)
Unknown_1098	Unknown	0.04 ( 0.01, 0.08)	0.04 ( 0.01, 0.08)
Unknown_1146	Unknown	0.04 ( 0.01, 0.08)	0.05 ( 0.02, 0.08)
Unknown_1153	Unknown	0.04 ( 0.00, 0.08)	-0.04 (-0.08,-0.01)
Unknown_1165	Unknown	0.04 ( 0.01, 0.08)	0.06 ( 0.02, 0.09)
Unknown_1194	Unknown	0.04 ( 0.00, 0.07)	0.04 ( 0.01, 0.08)
Unknown_138	Unknown	0.04 ( 0.00, 0.07)	-0.07 (-0.10,-0.03)
Unknown_219	Unknown	-0.05 (-0.08,-0.01)	0.05 ( 0.02, 0.09)
Unknown_258	Unknown	0.05 ( 0.02, 0.09)	0.04 ( 0.01, 0.08)
Unknown_260	Unknown	0.05 ( 0.01, 0.08)	-0.05 (-0.08,-0.01)
Unknown_429	Unknown	0.06 ( 0.02, 0.09)	0.06 ( 0.02, 0.09)
Unknown_587	Unknown	0.04 ( 0.01, 0.08)	0.04 ( 0.00, 0.07)
Unknown_831	Unknown	-0.05 (-0.08,-0.01)	0.05 ( 0.01, 0.08)
Unknown_885	Unknown	-0.04 (-0.07, 0.00)	0.04 ( 0.00, 0.07)
Unknown_912	Unknown	-0.04 (-0.07, 0.00)	0.05 ( 0.01, 0.08)
The letter A or B in the name of lipids indicates isomers.
¹ Beta coefficient of lipids associated with red or processed meat intake. Obtained by mixed-effects linear regression model, adjusting for age, sex, study center, education, BMI, fasting glucose, total energy intake, smoking, alcohol use, physical activity levels, lipid-lowering medication use, and hypertension status. Random effects were used to account for family relatedness.

## Sheet: suppl_tableS4
Supplemental Table S4. Meat intake-related lipids (q<0.05) associated with glucose/insuin homeostasis metrics
		Association with meat intake		Associations of lipids with glucose/insulin homeostasis metrics, beta(95%CI)2
Lipids	Class	Beta (95%CI)¹		Fasting glucose	HOMA-IR	QUCKI
Red meat-related lipids
CE(18:0)	Cholesterol ester	0.06 (0.03,0.10)		-0.05 (-0.08,-0.02)	-0.01 (-0.05,0.02)	0.00 (-0.03, 0.03)
PC(p-16:0/20:5)/PC(o-16:0/20:5)	Ether-phosphatidylcholine	0.08 (0.05,0.12)		0.00 (-0.03, 0.04)	0.05 ( 0.02,0.09)	-0.03 (-0.06, 0.00)
PC(p-16:0/22:6)/PC(o-16:1/22:6)	Ether-phosphatidylcholine	0.06 (0.02,0.09)		0.03 ( 0.00, 0.07)	0.05 ( 0.02,0.09)	-0.04 (-0.07,-0.01)
PC(p-22:3/18:5)/PC(o-22:4/18:5)	Ether-phosphatidylcholine	0.08 (0.04,0.12)		-0.03 (-0.06, 0.01)	-0.02 (-0.05,0.02)	0.07 ( 0.03, 0.10)
PC(p-36:3)/PC(o-36:4)	Ether-phosphatidylcholine	0.07 (0.03,0.10)		0.03 ( 0.00, 0.07)	0.04 ( 0.00,0.07)	-0.02 (-0.05, 0.01)
PC(p-36:4)/PC(o-36:5)	Ether-phosphatidylcholine	0.09 (0.05,0.13)		0.01 (-0.03, 0.04)	0.02 (-0.02,0.05)	0.03 ( 0.00, 0.06)
PC(p-36:5)/PC(o-36:6)	Ether-phosphatidylcholine	0.08 (0.05,0.12)		-0.01 (-0.04, 0.02)	0.03 (-0.01,0.06)	-0.02 (-0.05, 0.01)
PC(p-38:4)/PC(o-38:5) B	Ether-phosphatidylcholine	0.10 (0.06,0.14)		0.06 ( 0.02, 0.09)	0.03 (-0.01,0.06)	0.02 (-0.01, 0.05)
PC(p-38:5)/PC(o-38:6) B	Ether-phosphatidylcholine	0.07 (0.04,0.11)		-0.01 (-0.05, 0.02)	-0.02 (-0.05,0.02)	0.05 ( 0.02, 0.08)
PC(p-38:6)/PC(o-38:7)	Ether-phosphatidylcholine	0.06 (0.02,0.10)		0.02 (-0.02, 0.05)	0.06 ( 0.02,0.10)	-0.04 (-0.07, 0.00)
PC(p-40:6)/PC(o-40:7) B	Ether-phosphatidylcholine	0.07 (0.03,0.10)		0.08 ( 0.05, 0.12)	0.05 ( 0.01,0.09)	0.00 (-0.03, 0.03)
PE(p-38:4)/PE(o-38:5)	Ether-phosphatidylethanolamine	0.08 (0.05,0.12)		0.06 ( 0.02, 0.09)	0.06 ( 0.03,0.10)	-0.05 (-0.08,-0.02)
PE(p-38:5)/PE(o-38:6) A	Ether-phosphatidylethanolamine	0.06 (0.03,0.10)		0.05 ( 0.02, 0.09)	0.05 ( 0.02,0.09)	-0.05 (-0.08,-0.02)
PE(p-38:5)/PE(o-38:6) B	Ether-phosphatidylethanolamine	0.07 (0.03,0.10)		0.02 (-0.01, 0.05)	0.04 ( 0.01,0.08)	-0.04 (-0.07,-0.01)
SM(d41:1) A	Sphingomyelin	0.07 (0.03,0.10)		0.04 ( 0.00, 0.07)	0.01 (-0.02,0.05)	-0.06 (-0.09,-0.03)
Processed meat-related lipids
CE(22:5) A	Cholesterol ester	0.06 ( 0.03, 0.10)		-0.03 (-0.06, 0.00)	-0.02 (-0.06, 0.01)	0.01 (-0.02,0.04)
PC(p-14:0/16:0)/PC(o-14:0/16:0)	Ether-phosphatidylcholine	-0.07 (-0.11,-0.04)		-0.09 (-0.12,-0.05)	-0.03 (-0.06, 0.01)	0.06 ( 0.03,0.09)
SM(d30:1) A	Sphingomyelin	-0.10 (-0.13,-0.06)		-0.05 (-0.09,-0.02)	-0.01 (-0.05, 0.03)	-0.01 (-0.04,0.02)
SM(d30:1) B	Sphingomyelin	-0.08 (-0.12,-0.05)		-0.06 (-0.10,-0.03)	-0.01 (-0.04, 0.03)	-0.01 (-0.04,0.02)
SM(d32:2) A	Sphingomyelin	-0.07 (-0.11,-0.03)		-0.07 (-0.11,-0.04)	-0.04 (-0.08, 0.00)	0.02 (-0.01,0.06)
SM(d32:2) B	Sphingomyelin	-0.07 (-0.11,-0.03)		-0.17 (-0.21,-0.13)	-0.04 (-0.08, 0.00)	0.00 (-0.03,0.04)
SM(d42:2)	Sphingomyelin	0.06 ( 0.03, 0.10)		-0.03 (-0.06, 0.01)	-0.06 (-0.09,-0.02)	0.07 ( 0.03,0.10)
SM(d42:2) A	Sphingomyelin	0.07 ( 0.04, 0.10)		-0.06 (-0.09,-0.02)	-0.04 (-0.08,-0.01)	0.07 ( 0.04,0.10)
The letter A or B in the name of lipids indicates isomers. Boldface indicates statistical significance.
¹ Beta coefficient of lipids associated with red or processed meat intake. Obtained by mixed-effects linear regression model, adjusting for age, sex, study center, education, BMI, fasting glucose, total energy intake, smoking, alcohol use, physical activity levels, lipid-lowering medication use, and hypertension status. Random effects were used to account for family relatedness.
2 Beta coefficient of lipids associated with glucose/insulin metrics. Obtained by mixed-effects linear regression model, adjusting for the same covariates described above, except fasting glucose

## Sheet: suppl_tableS5
Supplemental Table S5. Associations of red or processed meat intake with glucose/insulin metrics
Meat intake	Models1	Glucose/insulin metrics, beta(95%CI)2
		Fasting glucose	HOMA-IR	QUCKI
Red meat	Model 1	4.02 (1.11, 6.92)	0.14 (-0.32, 0.60)	-0.00046 (-0.0015, 0.00063)
	Model 2	4.73 (0.82, 8.63)	0.42 (-0.19, 1.04)	-0.00049 (-0.0019, 0.00096)
	Model 3	3.98 (0.09, 7.88)	0.17 (-0.43, 0.76)	0.00059 (-0.00068, 0.0019)
Processed meat	Model 1	3.02 (0.40, 5.65)	0.01 (-0.41, 0.42)	-0.0009 (-0.0019, 0.000082)
	Model 2	3.91 (0.54, 7.29)	0.23 (-0.31, 0.76)	-0.0017 (-0.003, -0.00047)
	Model 3	3.53 (0.17, 6.88)	0.09 (-0.43, 0.61)	-0.0011 (-0.0022, -0.000026)
1 Model 1: adjusted for age, sex and study center; Model 2: further adjusted for education, total energy intake, smoking, alcohol drinking, physical activity, lipid-lowering medication, and hypertension; Model 3: further adjusted for BMI.
2 Beta (95%CI) were obtained from mixed-effects linear regression models. Data were not scaled before the analyses to improve interepration. Boldface indicates statistical significance.

## Sheet: suppl_tableS6
Supplemental Table S6. Mediation effects of lipids on the meat intake-fasting glucose association
Lipids	Class	Association with meat intake, beta (95%CI)¹		Mediation effect of lipids on the meat intake-fasting glucose association, beta(95%CI)
				Total effect (TE)	Average direct effect (ADE)	Average causal mediated effect (ACME)	% mediated2	P for % mediated
Red meat-related lipids
CE(18:0)	Cholesterol ester	0.06 (0.03,0.10)		0.069 (0.005,0.140)	0.075 ( 0.013,0.145)	-0.006 (-0.014,0.000)	-8.52 (-63.17, 0.94)	0.066
PC(p-16:0/20:5)/PC(o-16:0/20:5)	Ether-phosphatidylcholine	0.08 (0.05,0.12)		0.069 (0.004,0.140)	0.069 ( 0.005,0.139)	0.000 (-0.009,0.007)	-0.44 (-25.57, 22.28)	0.954
PC(p-16:0/22:6)/PC(o-16:1/22:6)	Ether-phosphatidylcholine	0.06 (0.02,0.09)		0.069 (0.005,0.139)	0.061 (-0.003,0.132)	0.008 ( 0.000,0.017)	10.99 ( -1.25, 59.86)	0.072
PC(p-22:3/18:5)/PC(o-22:4/18:5)	Ether-phosphatidylcholine	0.08 (0.04,0.12)		0.069 (0.004,0.141)	0.072 ( 0.007,0.142)	-0.003 (-0.012,0.006)	-3.45 (-39.74, 17.20)	0.584
PC(p-36:3)/PC(o-36:4)	Ether-phosphatidylcholine	0.07 (0.03,0.10)		0.069 (0.005,0.139)	0.062 (-0.001,0.132)	0.007 ( 0.001,0.015)	9.66 (0.64, 55.66)	0.042
PC(p-36:4)/PC(o-36:5)	Ether-phosphatidylcholine	0.09 (0.05,0.13)		0.069 (0.004,0.140)	0.063 (-0.002,0.133)	0.006 (-0.002,0.016)	8.74 (-6.51, 53.27)	0.162
PC(p-36:5)/PC(o-36:6)	Ether-phosphatidylcholine	0.08 (0.05,0.12)		0.069 (0.004,0.141)	0.071 ( 0.006,0.141)	-0.002 (-0.011,0.006)	-2.59 (-35.92, 17.69)	0.654
PC(p-38:4)/PC(o-38:5) B	Ether-phosphatidylcholine	0.10 (0.06,0.14)		0.069 (0.005,0.139)	0.056 (-0.010,0.126)	0.013 ( 0.003,0.025)	18.63 (2.42, 98.92)	0.044
PC(p-38:5)/PC(o-38:6) B	Ether-phosphatidylcholine	0.07 (0.04,0.11)		0.069 (0.004,0.140)	0.068 ( 0.004,0.138)	0.001 (-0.006,0.009)	1.86 (-17.69, 26.08)	0.716
PC(p-38:6)/PC(o-38:7)	Ether-phosphatidylcholine	0.06 (0.02,0.10)		0.069 (0.005,0.140)	0.066 ( 0.002,0.136)	0.003 (-0.003,0.010)	4.47 ( -8.49, 35.31)	0.364
PC(p-40:6)/PC(o-40:7) B	Ether-phosphatidylcholine	0.07 (0.03,0.10)		0.069 (0.004,0.139)	0.055 (-0.009,0.125)	0.014 ( 0.006,0.025)	20.11 ( 4.76,102.73)	0.032
PE(p-38:4)/PE(o-38:5)	Ether-phosphatidylethanolamine	0.08 (0.05,0.12)		0.069 (0.004,0.139)	0.056 (-0.008,0.126)	0.013 ( 0.005,0.023)	18.23 (4.27, 93.75)	0.032
PE(p-38:5)/PE(o-38:6) A	Ether-phosphatidylethanolamine	0.06 (0.03,0.10)		0.069 (0.005,0.139)	0.058 (-0.005,0.128)	0.011 ( 0.004,0.021)	15.86 (3.07, 75.39)	0.032
PE(p-38:5)/PE(o-38:6) B	Ether-phosphatidylethanolamine	0.07 (0.03,0.10)		0.069 (0.005,0.139)	0.060 (-0.003,0.130)	0.009 ( 0.002,0.017)	12.01 (1.20, 64.56)	0.038
SM(d41:1) A	Sphingomyelin	0.07 (0.03,0.10)		0.069 (0.006,0.139)	0.067 ( 0.004,0.137)	0.002 (-0.003,0.008)	2.72 (-7.90, 23.29)	0.41
Processed meat-related lipids
CE(22:5) A	Cholesterol ester	0.06 ( 0.030, 0.10)		0.069 (0.008, 0.137)	0.073 ( 0.011, 0.140)	-0.004 (-0.012, 0.001)	-5.38 (-41.99, 3.93)	0.164
PC(p-14:0/16:0)/PC(o-14:0/16:0)	Ether-phosphatidylcholine	-0.07 (-0.110,-0.04)		0.069 (0.006, 0.137)	0.056 (-0.004, 0.124)	0.013 ( 0.004, 0.023)	18.09 ( 3.92,102.64)	0.028
SM(d30:1) A	Sphingomyelin	-0.10 (-0.130,-0.06)		0.069 (0.006, 0.137)	0.056 (-0.005, 0.126)	0.013 ( 0.005, 0.023)	18.97 ( 4.46,103.48)	0.03
SM(d30:1) B	Sphingomyelin	-0.08 (-0.120,-0.05)		0.069 (0.006, 0.137)	0.059 (-0.002, 0.128)	0.010 ( 0.003, 0.020)	14.85 ( 2.75, 77.14)	0.032
SM(d32:2) A	Sphingomyelin	-0.07 (-0.110,-0.03)		0.069 (0.006, 0.137)	0.062 ( 0.001, 0.131)	0.007 ( 0.001, 0.015)	10.47 ( 0.94, 53.24)	0.042
SM(d32:2) B	Sphingomyelin	-0.07 (-0.110,-0.03)		0.069 (0.006, 0.137)	0.054 (-0.006, 0.122)	0.016 ( 0.006, 0.028)	22.73 ( 4.40,126.71)	0.03
SM(d42:2)	Sphingomyelin	0.06 ( 0.030, 0.10)		0.069 (0.008, 0.137)	0.071 ( 0.010, 0.139)	-0.002 (-0.010, 0.004)	-3.03 (-34.18, 10.10)	0.476
SM(d42:2) A	Sphingomyelin	0.07 ( 0.040, 0.10)		0.069 (0.007, 0.137)	0.076 ( 0.014, 0.143)	-0.007 (-0.015, 0.000)	-8.91 (-65.40, 0.66)	0.062
The letter A or B in the name of lipids indicates isomers. Data were scaled to zero mean unite variance before the analyses.
¹ Beta coefficient of lipids associated with red or processed meat intake. Obtained by mixed-effects linear regression model, adjusting for age, sex, study center, education, BMI, fasting glucose, total energy intake, smoking, alcohol use, physical activity levels, lipid-lowering medication use, and hypertension status. Random effects were used to account for family relatedness.
2 Mediation analyses were conducted using baseline data, adjusting for age, sex, study center, education, BMI, total energy intake, smoking, alcohol drinking, physical activity levels, lipid-lowering medication use, and hypertension at baseline. Mediation percentage of lipids was calculated as the average causal mediation effects (ACME) relative to the total effect (TE). Boldface indicates statis…

## Sheet: suppl_tableS7
Supplemental Table S7. Lipid species associated with red or processed meat intake (P<0.05) in male and female
			Association with meat intake
Stratification	Lipids	Class	Beta (95%CI)¹	P value	q value2
Male (n=677)
	Red meat-related lipids
	CE(18:0)	Cholesterol ester	0.06 ( 0.00,0.12)	0.039	0.984
	CE(18:1)	Cholesterol ester	0.09 ( 0.02,0.15)	0.007	0.651
	CE(18:3)	Cholesterol ester	0.07 ( 0.01,0.13)	0.02	0.944
	CE(20:3)	Cholesterol ester	0.08 ( 0.02,0.14)	0.013	0.834
	FA(15:0)	Fatty acid	0.09 ( 0.03,0.15)	0.002	0.432
	LPC(o-16:0)	Lysophosphatidylcholine	-0.06 (-0.12,0.00)	0.048	0.984
	PC(17:0/20:3)	Phosphatidylcholine	0.08 ( 0.02,0.13)	0.013	0.834
	PC(p-16:0/22:6)/PC(o-16:1/22:6)	Ether-phosphatidylcholine	0.07 ( 0.01,0.13)	0.022	0.944
	PC(p-18:1/26:2)/PC(o-18:2/26:2)	Ether-phosphatidylcholine	0.07 ( 0.01,0.13)	0.017	0.922
	PC(p-22:3/18:5)/PC(o-22:4/18:5)	Ether-phosphatidylcholine	0.08 ( 0.02,0.14)	0.006	0.651
	PC(p-34:2)/PC(o-34:3)	Ether-phosphatidylcholine	0.07 ( 0.01,0.13)	0.021	0.944
	PC(p-36:2)/PC(o-36:3)	Ether-phosphatidylcholine	0.07 ( 0.01,0.13)	0.016	0.906
	PC(p-36:4)/PC(o-36:5)	Ether-phosphatidylcholine	0.10 ( 0.04,0.16)	0.002	0.432
	PC(p-36:5)/PC(o-36:6)	Ether-phosphatidylcholine	0.07 ( 0.01,0.13)	0.033	0.984
	PC(p-38:4)/PC(o-38:5) B	Ether-phosphatidylcholine	0.11 ( 0.06,0.17)	<0.001	0.087
	PC(p-38:5)/PC(o-38:6) B	Ether-phosphatidylcholine	0.09 ( 0.03,0.15)	0.003	0.444
	PC(p-38:6)/PC(o-38:7)	Ether-phosphatidylcholine	0.07 ( 0.01,0.13)	0.024	0.984
	PC(p-40:6)/PC(o-40:7) B	Ether-phosphatidylcholine	0.08 ( 0.02,0.14)	0.011	0.805
	PC(p-42:4)/PC(o-42:5)	Ether-phosphatidylcholine	0.06 ( 0.00,0.12)	0.04	0.984
	PC(p-44:4)/PC(o-44:5)	Ether-phosphatidylcholine	0.06 ( 0.01,0.12)	0.032	0.984
	PE(p-36:1)/PE(o-36:2) B	Ether-phosphatidylethanolamine	0.06 ( 0.01,0.12)	0.03	0.984
	PE(p-38:4)/PE(o-38:5)	Ether-phosphatidylethanolamine	0.06 ( 0.00,0.12)	0.039	0.984
	PG(18:0/18:2)	Phosphatidylglycerol	-0.06 (-0.12,0.00)	0.035	0.984
	TAG(40:0)	Triacylglycerol	-0.06 (-0.12,0.00)	0.04	0.984
	TAG(42:1)	Triacylglycerol	-0.06 (-0.12,0.00)	0.048	0.984
	TAG(54:6)/TAG(16:0/18:2/20:4)	Triacylglycerol	0.06 ( 0.00,0.12)	0.042	0.984
	Processed meat-related lipids
	CE(22:5) A	Cholesterol ester	0.07 ( 0.02, 0.13)	0.009	0.996
	LPC(20:5)	Lysophosphatidylcholine	-0.06 (-0.12, 0.00)	0.043	0.996
	PC(36:5) B	Phosphatidylcholine	-0.06 (-0.12,-0.01)	0.032	0.996
	PC(38:5) B	Phosphatidylcholine	-0.06 (-0.11, 0.00)	0.045	0.996
	PC(40:7) A	Phosphatidylcholine	0.10 ( 0.04, 0.15)	0.001	0.429
	PC(p-14:0/16:0)/PC(o-14:0/16:0)	Ether-phosphatidylcholine	-0.08 (-0.14,-0.02)	0.005	0.996
	PC(p-16:1/26:2)/PC(o-16:2/26:2)	Ether-phosphatidylcholine	-0.06 (-0.12,-0.01)	0.028	0.996
	PC(p-18:1/26:2)/PC(o-18:2/26:2)	Ether-phosphatidylcholine	-0.06 (-0.12, 0.00)	0.038	0.996
	PE(p-38:3)/PE(o-38:4)	Ether-phosphatidylethanolamine	0.06 ( 0.01, 0.12)	0.028	0.996
	SM(d30:1) A	Sphingomyelin	-0.06 (-0.12, 0.00)	0.039	0.996
	SM(d32:2) A	Sphingomyelin	-0.06 (-0.12, 0.00)	0.036	0.996
	SM(d34:0) B	Sphingomyelin	0.06 ( 0.01, 0.12)	0.029	0.996
	SM(d42:2)	Sphingomyelin	0.06 ( 0.00, 0.11)	0.048	0.996
	SM(d42:2) A	Sphingomyelin	0.06 ( 0.00, 0.11)	0.047	0.996
	SM(d44:2) B	Sphingomyelin	0.07 ( 0.01, 0.12)	0.018	0.996
Female (n=1,139)
	Red meat-related lipids
	AC(8:1)	Acylcarnitine	-0.05 (-0.09, 0.00)	0.041	0.265
	CE(18:0)	Cholesterol ester	0.05 ( 0.01, 0.10)	0.024	0.218
	CE(20:5)	Cholesterol ester	0.06 ( 0.01, 0.10)	0.011	0.173
	CER(d39:1)	Ceramide	0.07 ( 0.02, 0.11)	0.004	0.105
	DAG(16:0/16:1)	Diacylglycerol	0.05 ( 0.01, 0.10)	0.02	0.208
	FA(15:1)	Fatty acid	-0.04 (-0.09, 0.00)	0.046	0.272
	FA(18:2)	Fatty acid	-0.05 (-0.09,-0.01)	0.018	0.201
	LPC(20:4) B	Lysophosphatidylcholine	0.05 ( 0.01, 0.10)	0.017	0.198
	PC(16:1/16:1)	Phosphatidylcholine	0.05 ( 0.01, 0.09)	0.024	0.218
	PC(20:2/20:2)	Phosphatidylcholine	0.05 ( 0.01, 0.09)	0.024	0.218
	PC(38:6) C	Phosphatidylcholine	-0.07 (-0.11,-0.03)	0.001	0.059
	PC(o-34:0)	Ether-phosphatidylcholine	0.05 ( 0.01, 0.10)	0.017	0.198
	PC(p-14:0/20:3)/PC(o-14:0/20:3)	Ether-phosphatidylcholine	0.05 ( 0.01, 0.10)	0.018	0.201
	PC(p-14:0/20:4)/PC(o-14:0/20:4)	Ether-phosphatidylcholine	0.06 ( 0.01, 0.10)	0.01	0.154
	PC(p-14:0/22:3)/PC(o-14:0/22:3)	Ether-phosphatidylcholine	0.06 ( 0.01, 0.10)	0.013	0.186
	PC(p-16:0/20:3)/PC(o-16:1/20:3)	Ether-phosphatidylcholine	0.11 ( 0.06, 0.15)	<0.001	<0.001
	PC(p-16:0/20:5)/PC(o-16:0/20:5)	Ether-phosphatidylcholine	0.12 ( 0.07, 0.16)	<0.001	<0.001
	PC(p-16:0/22:5)/PC(o-16:1/22:5)	Ether-phosphatidylcholine	0.06 ( 0.02, 0.11)	0.008	0.146
	PC(p-16:0/22:6)/PC(o-16:1/22:6)	Ether-phosphatidylcholine	0.05 ( 0.01, 0.09)	0.026	0.222
	PC(p-18:0/16:0)/PC(o-18:0/16:0)	Ether-phosphatidylcholine	0.04 ( 0.00, 0.09)	0.049	0.28
	PC(p-18:0/20:4)/PC(o-18:1/20:4)	Ether-phosphatidylcholine	0.06 ( 0.02, 0.10)	0.006	0.127
	PC(p-18:1/20:4)/PC(o-18:2/20:4)	Ether-phosphatidylcholine	0.08 ( 0.03, 0.12)	0.001	0.04
	PC(p-18:2/17:0)/PC(o-18:3/17:0)	Ether-phosphatidylcholine	0.05 ( 0.00, 0.09)	0.034	0.236
	PC(p-22:3/18:5)/PC(o-22:4/18:5)	Ether-phosphatidylcholine	0.07 ( 0.03, 0.12)	0.001	0.059
	PC(p-32:1)/PC(o-32:2)	Ether-phosphatidylcholine	0.05 ( 0.01, 0.09)	0.025	0.218
	PC(p-34:1)/PC(o-34:2) A	Ether-phosphatidylcholine	0.05 ( 0.01, 0.09)	0.023	0.218
	PC(p-36:1)/PC(o-36:2) A	Ether-phosphatidylcholine	0.04 ( 0.00, 0.09)	0.05	0.28
	PC(p-36:2)/PC(o-36:3)	Ether-phosphatidylcholine	0.05 ( 0.00, 0.09)	0.043	0.269
	PC(p-36:3)/PC(o-36:4)	Ether-phosphatidylcholine	0.07 ( 0.03, 0.11)	0.002	0.074
	PC(p-36:4)/PC(o-36:5)	Ether-phosphatidylcholine	0.07 ( 0.02, 0.11)	0.002	0.075
	PC(p-36:5)/PC(o-36:6)	Ether-phosphatidylcholine	0.09 ( 0.04, 0.13)	<0.001	0.013
	PC(p-38:2)/PC(o-38:3)	Ether-phosphatidylcholine	0.05 ( 0.00, 0.09)	0.032	0.236
	PC(p-38:3)/PC(o-38:4) B	Ether-phosphatidylcholine	0.06 ( 0.02, 0.10)	0.008	0.147
	PC(p-38:4)/PC(o-38:5) A	Ether-phosphatidylcholine	0.05 ( 0.01, 0.09)	0.025	0.218
	PC(p-38:4)/PC(o-38:5) B	Ether-phosphatidylcholine	0.08 ( 0.03, 0.12)	0.001	0.046
	PC(p-38:5)/PC(o-38:6) B	Ether-phosphatidylcholine	0.06 ( 0.01, 0.10)	0.015	0.198
	PC(p-38:6)/PC(o-38:7)	Ether-phosphatidylcholine	0.05 ( 0.00, 0.09)	0.04	0.262
	PC(p-40:3)/PC(o-40:4)	Ether-phosphatidylcholine	0.06 ( 0.02, 0.10)	0.007	0.136
	PC(p-40:5)/PC(o-40:6)	Ether-phosphatidylcholine	0.05 ( 0.00, 0.09)	0.045	0.272
	PC(p-40:6)/PC(o-40:7) B	Ether-phosphatidylcholine	0.06 ( 0.01, 0.10)	0.017	0.198
	PC(p-42:3)/PC(o-42:4)	Ether-phosphatidylcholine	0.05 ( 0.01, 0.10)	0.018	0.201
	PC(p-42:5)/PC(o-42:6) A	Ether-phosphatidylcholine	0.05 ( 0.01, 0.10)	0.017	0.198
	PC(p-42:5)/PC(o-42:6) B	Ether-phosphatidylcholine	0.05 ( 0.00, 0.09)	0.041	0.265
	PC(p-44:5)/PC(o-44:6)	Ether-phosphatidylcholine	0.04 ( 0.00, 0.09)	0.044	0.272
	PE(18:2/18:2)	Phosphatidylethanolamine	-0.05 (-0.09,-0.01)	0.028	0.225
	PE(38:4)	Phosphatidylethanolamine	0.06 ( 0.01, 0.10)	0.018	0.201
	PE(p-18:0/20:5)/PE(o-18:1/20:5)	Ether-phosphatidylethanolamine	0.06 ( 0.02, 0.11)	0.006	0.128
	PE(p-18:0/22:4)/PE(o-18:1/22:4)	Ether-phosphatidylethanolamine	0.08 ( 0.04, 0.13)	<0.001	0.03
	PE(p-36:4)/PE(o-36:5) A	Ether-phosphatidylethanolamine	0.06 ( 0.02, 0.11)	0.007	0.136
	PE(p-36:4)/PE(o-36:5) B	Ether-phosphatidylethanolamine	0.07 ( 0.02, 0.11)	0.003	0.081
	PE(p-36:5)/PE(o-36:6)	Ether-phosphatidylethanolamine	0.04 ( 0.00, 0.09)	0.042	0.268
	PE(p-38:3)/PE(o-38:4)	Ether-phosphatidylethanolamine	0.05 ( 0.01, 0.09)	0.028	0.226
	PE(p-38:4)/PE(o-38:5)	Ether-phosphatidylethanolamine	0.10 ( 0.05, 0.14)	<0.001	0.004
	PE(p-38:5)/PE(o-38:6) A	Ether-phosphatidylethanolamine	0.08 ( 0.03, 0.12)	0.001	0.046
	PE(p-38:5)/PE(o-38:6) B	Ether-phosphatidylethanolamine	0.09 ( 0.04, 0.13)	<0.001	0.013
	PE(p-40:4)/PE(o-40:5)	Ether-phosphatidylethanolamine	0.06 ( 0.01, 0.10)	0.015	0.196
	PE(p-40:4)/PE(o-40:5) A	Ether-phosphatidylethanolamine	0.06 ( 0.02, 0.11)	0.006	0.127
	PE(p-40:4)/PE(o-40:5) B	Ether-phosphatidylethanolamine	0.06 ( 0.02, 0.11)	0.005	0.124
	PE(p-40:5)/PE(o-40:6) B	Ether-phosphatidylethanolamine	0.09 ( 0.04, 0.13)	<0.001	0.013
	PI(16:0/18:0)	Phosphatidylinositol	0.06 ( 0.02, 0.11)	0.005	0.124
	PS(18:0/20:4)	Phosphatidylserine	0.06 ( 0.01, 0.10)	0.01	0.154
	SM(d14:1/29:0) A	Sphingomyelin	0.06 ( 0.02, 0.10)	0.008	0.147
	SM(d17:0/18:2) B	Sphingomyelin	0.05 ( 0.00, 0.09)	0.049	0.28
	SM(d33:1) A	Sphingomyelin	0.05 ( 0.01, 0.10)	0.028	0.225
	SM(d33:1) B	Sphingomyelin	0.05 ( 0.01, 0.09)	0.028	0.225
	SM(d34:2) B	Sphingomyelin	0.07 ( 0.02, 0.11)	0.003	0.079
	SM(d36:2) B	Sphingomyelin	0.05 ( 0.01, 0.10)	0.016	0.198
	SM(d37:1) A	Sphingomyelin	0.06 ( 0.02, 0.11)	0.009	0.154
	SM(d37:1) B	Sphingomyelin	0.05 ( 0.01, 0.10)	0.025	0.218
	SM(d38:1) A	Sphingomyelin	0.06 ( 0.01, 0.10)	0.015	0.198
	SM(d39:1) A	Sphingomyelin	0.08 ( 0.03, 0.12)	0.001	0.059
	SM(d39:1) B	Sphingomyelin	0.06 ( 0.02, 0.11)	0.009	0.154
	SM(d40:0) A	Sphingomyelin	0.05 ( 0.01, 0.10)	0.019	0.205
	SM(d40:1) A	Sphingomyelin	0.05 ( 0.01, 0.10)	0.028	0.225
	SM(d40:1) B	Sphingomyelin	0.05 ( 0.00, 0.10)	0.032	0.236
	SM(d41:1) A	Sphingomyelin	0.08 ( 0.03, 0.12)	0.001	0.046
	SM(d41:2)	Sphingomyelin	0.06 ( 0.02, 0.11)	0.008	0.147
	SM(d41:2) A	Sphingomyelin	0.07 ( 0.03, 0.11)	0.002	0.061
	SM(d41:2) B	Sphingomyelin	0.05 ( 0.01, 0.10)	0.022	0.216
	SM(d42:1) B	Sphingomyelin	0.05 ( 0.01, 0.10)	0.019	0.205
	SM(d43:1) A	Sphingomyelin	0.06 ( 0.01, 0.10)	0.013	0.183
	SM(d43:1) B	Sphingomyelin	0.04 ( 0.00, 0.09)	0.048	0.277
	SM(d43:2) A	Sphingomyelin	0.05 ( 0.01, 0.10)	0.014	0.19
	SM(d43:2) B	Sphingomyelin	0.05 ( 0.01, 0.10)	0.019	0.205
	SM(d44:2) A	Sphingomyelin	0.06 ( 0.01, 0.10)	0.012	0.18
	TAG(54:3)	Triacylglycerol	-0.05 (-0.09, 0.00)	0.044	0.272
	TAG(54:4)/TAG(18:1/18:1/18:2)	Triacylglycerol	-0.06 (-0.10,-0.01)	0.011	0.171
	TAG(54:6)/TAG(16:0/18:2/20:4)	Triacylglycerol	0.05 ( 0.00, 0.09)	0.039	0.261
	TAG(54:7)/TAG(16:0/16:1/22:6)	Triacylglycerol	0.06 ( 0.01, 0.10)	0.013	0.183
	TAG(54:7)/TAG(16:0/18:2/20:5)	Triacylglycerol	0.05 ( 0.01, 0.10)	0.019	0.205
	Processed meat-related lipids
	CE(22:5) A	Cholesterol ester	0.05 ( 0.01, 0.09)	0.023	0.311
	CER(d39:1)	Ceramide	-0.06 (-0.11,-0.01)	0.013	0.271
	CER(d40:1)	Ceramide	-0.05 (-0.09, 0.00)	0.048	0.358
	FA(18:2)	Fatty acid	-0.07 (-0.11,-0.02)	0.003	0.138
	FA(22:0)	Fatty acid	-0.05 (-0.09,-0.01)	0.028	0.314
	LPC(15:0)	Lysophosphatidylcholine	-0.05 (-0.09,-0.01)	0.026	0.313
	LPC(18:2)	Lysophosphatidylcholine	-0.05 (-0.10, 0.00)	0.031	0.325
	LPC(20:3)	Lysophosphatidylcholine	-0.04 (-0.09, 0.00)	0.044	0.353
	LPC(24:0)	Lysophosphatidylcholine	-0.07 (-0.12,-0.03)	0.002	0.123
	LPC(p-18:0)/LPC(o-18:1)	Lysophosphatidylcholine	0.04 ( 0.00, 0.09)	0.046	0.355
	LPE(20:3)	Lysophosphatidylethanolamine	-0.06 (-0.10,-0.02)	0.007	0.225
	PC(28:0)	Phosphatidylcholine	-0.05 (-0.09, 0.00)	0.033	0.329
	PC(32:2)	Phosphatidylcholine	-0.05 (-0.09, 0.00)	0.032	0.325
	PC(32:3)	Phosphatidylcholine	-0.04 (-0.09, 0.00)	0.044	0.353
	PC(34:0)	Phosphatidylcholine	-0.05 (-0.09,-0.01)	0.028	0.314
	PC(34:3) B	Phosphatidylcholine	-0.05 (-0.10,-0.01)	0.026	0.313
	PC(36:4) A	Phosphatidylcholine	-0.05 (-0.10,-0.01)	0.016	0.281
	PC(38:5) A	Phosphatidylcholine	-0.05 (-0.09, 0.00)	0.046	0.355
	PC(38:6) A	Phosphatidylcholine	-0.06 (-0.10,-0.01)	0.015	0.271
	PC(40:6) A	Phosphatidylcholine	-0.07 (-0.12,-0.02)	0.005	0.198
	PC(40:8)	Phosphatidylcholine	-0.05 (-0.09, 0.00)	0.046	0.355
	PC(o-34:0)	Ether-phosphatidylcholine	-0.05 (-0.09, 0.00)	0.035	0.335
	PC(p-14:0/16:0)/PC(o-14:0/16:0)	Ether-phosphatidylcholine	-0.06 (-0.10,-0.01)	0.011	0.264
	PC(p-14:0/22:2)/PC(o-14:1/22:2)	Ether-phosphatidylcholine	-0.04 (-0.09, 0.00)	0.048	0.358
	PC(p-16:0/20:5)/PC(o-16:0/20:5)	Ether-phosphatidylcholine	-0.05 (-0.09,-0.01)	0.025	0.313
	PC(p-16:1/24:4)/PC(o-16:2/24:4)	Ether-phosphatidylcholine	-0.07 (-0.12,-0.03)	0.002	0.121
	PC(p-16:1/2:0)/PC(o-16:2/2:0)	Ether-phosphatidylcholine	-0.05 (-0.09, 0.00)	0.039	0.341
	PC(p-42:5)/PC(o-42:6) A	Ether-phosphatidylcholine	-0.05 (-0.10,-0.01)	0.025	0.313
	PE(36:4e)/PE(16:0e/20:4)	Phosphatidylethanolamine	-0.05 (-0.09, 0.00)	0.035	0.335
	SM(d14:1/29:0) A	Sphingomyelin	-0.07 (-0.11,-0.02)	0.003	0.138
	SM(d15:0/16:1)	Sphingomyelin	-0.06 (-0.11,-0.02)	0.005	0.198
	SM(d17:0/18:2) A	Sphingomyelin	-0.06 (-0.10,-0.01)	0.014	0.271
	SM(d30:1) A	Sphingomyelin	-0.11 (-0.16,-0.07)	<0.001	0.001
	SM(d30:1) B	Sphingomyelin	-0.10 (-0.14,-0.06)	<0.001	0.004
	SM(d32:1) A	Sphingomyelin	-0.07 (-0.11,-0.02)	0.003	0.161
	SM(d32:1) B	Sphingomyelin	-0.05 (-0.10,-0.01)	0.016	0.281
	SM(d32:2) A	Sphingomyelin	-0.08 (-0.12,-0.03)	0.001	0.083
	SM(d32:2) B	Sphingomyelin	-0.08 (-0.12,-0.03)	0.001	0.083
	SM(d36:0) B	Sphingomyelin	0.06 ( 0.01, 0.10)	0.015	0.271
	SM(d36:3) A	Sphingomyelin	-0.05 (-0.10, 0.00)	0.032	0.325
	SM(d38:1) A	Sphingomyelin	-0.05 (-0.10,-0.01)	0.027	0.314
	SM(d38:2) A	Sphingomyelin	-0.05 (-0.10,-0.01)	0.026	0.313
	SM(d39:1) A	Sphingomyelin	-0.07 (-0.12,-0.03)	0.002	0.138
	SM(d39:1) B	Sphingomyelin	-0.06 (-0.11,-0.02)	0.008	0.228
	SM(d40:1) B	Sphingomyelin	-0.05 (-0.09, 0.00)	0.044	0.354
	SM(d40:2) B	Sphingomyelin	-0.07 (-0.12,-0.02)	0.003	0.161
	SM(d40:2) C	Sphingomyelin	-0.06 (-0.10,-0.01)	0.015	0.271
	SM(d41:2)	Sphingomyelin	-0.05 (-0.09, 0.00)	0.041	0.351
	SM(d41:2) B	Sphingomyelin	-0.07 (-0.11,-0.02)	0.006	0.214
	SM(d42:2)	Sphingomyelin	0.06 ( 0.02, 0.11)	0.004	0.188
	SM(d42:2) A	Sphingomyelin	0.08 ( 0.04, 0.12)	<0.001	0.061
	SM(d43:1) A	Sphingomyelin	-0.05 (-0.10,-0.01)	0.018	0.283
	TAG(54:6)/TAG(16:0/18:2/20:4)	Triacylglycerol	-0.06 (-0.10,-0.01)	0.009	0.249
	TAG(56:7) A	Triacylglycerol	-0.06 (-0.11,-0.01)	0.016	0.279
The letter A or B in the name of lipids indicates isomers. Only known lipids are shown.
¹ Beta coefficient of lipids associated with red or processed meat intake. Obtained by mixed-effects linear regression model, adjusting for age, study center, education, BMI, fasting glucose, total energy intake, smoking, alcohol use, physical activity levels, lipid-lowering medication use, and hypertension status. Random effects were used to account for family relatedness.
² Adjusted for multiple testing using the Storey’s q-value method.

## Sheet: suppl_tableS8
Supplemental Table S8. Lipid species associated with red or processed meat intake (P<0.05), further adjusted for grains
		Association with meat intake
Lipids	Class	Beta (95%CI)¹	P value	q value2
Red meat-related lipids
CE(18:0)	Cholesterol ester	0.06 ( 0.02, 0.10)	0.001	0.052
CE(18:1)	Cholesterol ester	0.04 ( 0.01, 0.08)	0.021	0.21
CE(18:3)	Cholesterol ester	0.04 ( 0.01, 0.08)	0.02	0.206
CE(20:2)	Cholesterol ester	0.04 ( 0.00, 0.08)	0.033	0.256
CE(20:3)	Cholesterol ester	0.04 ( 0.01, 0.08)	0.018	0.2
CE(20:5)	Cholesterol ester	0.04 ( 0.00, 0.07)	0.038	0.275
CE(22:2)	Cholesterol ester	0.04 ( 0.00, 0.07)	0.04	0.28
CER(d34:0)	Ceramide	-0.04 (-0.08,-0.01)	0.023	0.216
FA(15:0)	Fatty acid	0.04 ( 0.00, 0.07)	0.042	0.28
PC(13:1/26:4)	Phosphatidylcholine	0.04 ( 0.01, 0.08)	0.022	0.212
PC(17:0/20:3)	Phosphatidylcholine	0.05 ( 0.01, 0.08)	0.006	0.134
PC(36:2)	Phosphatidylcholine	-0.04 (-0.07, 0.00)	0.031	0.244
PC(37:3)	Phosphatidylcholine	0.04 ( 0.00, 0.07)	0.042	0.28
PC(37:4)	Phosphatidylcholine	0.04 ( 0.01, 0.08)	0.014	0.19
PC(37:5)	Phosphatidylcholine	0.04 ( 0.00, 0.08)	0.028	0.231
PC(42:5)	Phosphatidylcholine	-0.04 (-0.07, 0.00)	0.025	0.222
PC(42:6)	Phosphatidylcholine	-0.03 (-0.07, 0.00)	0.049	0.301
PC(p-14:0/20:4)/PC(o-14:0/20:4)	Ether-phosphatidylcholine	0.05 ( 0.01, 0.08)	0.009	0.154
PC(p-14:0/22:3)/PC(o-14:0/22:3)	Ether-phosphatidylcholine	0.04 ( 0.01, 0.08)	0.012	0.181
PC(p-16:0/20:5)/PC(o-16:0/20:5)	Ether-phosphatidylcholine	0.08 ( 0.04, 0.11)	<0.001	0.004
PC(p-16:0/22:5)/PC(o-16:1/22:5)	Ether-phosphatidylcholine	0.06 ( 0.02, 0.09)	0.003	0.089
PC(p-16:0/22:6)/PC(o-16:0/22:6)	Ether-phosphatidylcholine	0.04 ( 0.01, 0.07)	0.024	0.22
PC(p-16:0/22:6)/PC(o-16:1/22:6)	Ether-phosphatidylcholine	0.06 ( 0.02, 0.09)	0.001	0.042
PC(p-18:0/20:4)/PC(o-18:1/20:4)	Ether-phosphatidylcholine	0.04 ( 0.01, 0.08)	0.013	0.19
PC(p-18:0/22:4)/PC(o-18:0/22:4)	Ether-phosphatidylcholine	0.04 ( 0.00, 0.07)	0.028	0.231
PC(p-18:1/20:4)/PC(o-18:2/20:4)	Ether-phosphatidylcholine	0.04 ( 0.01, 0.08)	0.014	0.19
PC(p-18:1/26:2)/PC(o-18:2/26:2)	Ether-phosphatidylcholine	0.04 ( 0.00, 0.07)	0.045	0.286
PC(p-18:2/17:0)/PC(o-18:3/17:0)	Ether-phosphatidylcholine	0.04 ( 0.00, 0.08)	0.028	0.231
PC(p-22:3/18:5)/PC(o-22:4/18:5)	Ether-phosphatidylcholine	0.08 ( 0.04, 0.11)	<0.001	0.004
PC(p-34:2)/PC(o-34:3)	Ether-phosphatidylcholine	0.05 ( 0.02, 0.09)	0.003	0.09
PC(p-36:1)/PC(o-36:2) B	Ether-phosphatidylcholine	0.05 ( 0.01, 0.08)	0.016	0.194
PC(p-36:2)/PC(o-36:3)	Ether-phosphatidylcholine	0.06 ( 0.02, 0.10)	0.001	0.046
PC(p-36:3)/PC(o-36:4)	Ether-phosphatidylcholine	0.06 ( 0.02, 0.09)	0.001	0.048
PC(p-36:4)/PC(o-36:5)	Ether-phosphatidylcholine	0.08 ( 0.05, 0.12)	<0.001	0.002
PC(p-36:5)/PC(o-36:6)	Ether-phosphatidylcholine	0.08 ( 0.04, 0.11)	<0.001	0.004
PC(p-38:2)/PC(o-38:3)	Ether-phosphatidylcholine	0.04 ( 0.01, 0.08)	0.015	0.193
PC(p-38:3)/PC(o-38:4) B	Ether-phosphatidylcholine	0.05 ( 0.02, 0.09)	0.005	0.128
PC(p-38:4)/PC(o-38:5) A	Ether-phosphatidylcholine	0.04 ( 0.01, 0.08)	0.013	0.19
PC(p-38:4)/PC(o-38:5) B	Ether-phosphatidylcholine	0.10 ( 0.07, 0.14)	<0.001	<0.001
PC(p-38:5)/PC(o-38:6) B	Ether-phosphatidylcholine	0.07 ( 0.03, 0.11)	<0.001	0.01
PC(p-38:6)/PC(o-38:7)	Ether-phosphatidylcholine	0.06 ( 0.03, 0.10)	<0.001	0.024
PC(p-40:3)/PC(o-40:4)	Ether-phosphatidylcholine	0.05 ( 0.01, 0.08)	0.008	0.145
PC(p-40:6)/PC(o-40:7) B	Ether-phosphatidylcholine	0.07 ( 0.03, 0.11)	<0.001	0.011
PC(p-42:3)/PC(o-42:4)	Ether-phosphatidylcholine	0.05 ( 0.01, 0.08)	0.008	0.145
PC(p-42:5)/PC(o-42:6) A	Ether-phosphatidylcholine	0.04 ( 0.00, 0.07)	0.04	0.28
PC(p-42:5)/PC(o-42:6) B	Ether-phosphatidylcholine	0.04 ( 0.01, 0.08)	0.018	0.194
PC(p-44:4)/PC(o-44:5)	Ether-phosphatidylcholine	0.04 ( 0.01, 0.08)	0.015	0.193
PC(p-44:5)/PC(o-44:6)	Ether-phosphatidylcholine	0.04 ( 0.01, 0.08)	0.017	0.194
PE(18:2/18:2)	Phosphatidylethanolamine	-0.04 (-0.08,-0.01)	0.016	0.194
PE(p-18:0/20:5)/PE(o-18:1/20:5)	Ether-phosphatidylethanolamine	0.05 ( 0.01, 0.08)	0.009	0.152
PE(p-36:1)/PE(o-36:2) B	Ether-phosphatidylethanolamine	0.05 ( 0.01, 0.08)	0.011	0.169
PE(p-36:4)/PE(o-36:5) A	Ether-phosphatidylethanolamine	0.04 ( 0.01, 0.08)	0.021	0.212
PE(p-36:4)/PE(o-36:5) B	Ether-phosphatidylethanolamine	0.05 ( 0.01, 0.09)	0.006	0.134
PE(p-38:4)/PE(o-38:5)	Ether-phosphatidylethanolamine	0.08 ( 0.04, 0.11)	<0.001	0.004
PE(p-38:5)/PE(o-38:6) A	Ether-phosphatidylethanolamine	0.06 ( 0.02, 0.09)	0.002	0.08
PE(p-38:5)/PE(o-38:6) B	Ether-phosphatidylethanolamine	0.06 ( 0.02, 0.09)	0.001	0.042
PE(p-40:5)/PE(o-40:6) B	Ether-phosphatidylethanolamine	0.04 ( 0.00, 0.08)	0.027	0.227
SM(d14:1/29:0) A	Sphingomyelin	0.05 ( 0.01, 0.08)	0.013	0.19
SM(d17:0/18:2) A	Sphingomyelin	0.04 ( 0.01, 0.08)	0.023	0.214
SM(d17:0/18:2) B	Sphingomyelin	0.04 ( 0.00, 0.07)	0.035	0.259
SM(d37:1) A	Sphingomyelin	0.06 ( 0.02, 0.09)	0.002	0.078
SM(d37:1) B	Sphingomyelin	0.06 ( 0.02, 0.09)	0.003	0.089
SM(d38:1) A	Sphingomyelin	0.04 ( 0.00, 0.08)	0.026	0.227
SM(d39:1) A	Sphingomyelin	0.05 ( 0.02, 0.09)	0.005	0.119
SM(d39:1) B	Sphingomyelin	0.05 ( 0.01, 0.08)	0.016	0.194
SM(d41:1) A	Sphingomyelin	0.07 ( 0.03, 0.10)	<0.001	0.017
SM(d41:2)	Sphingomyelin	0.05 ( 0.01, 0.08)	0.016	0.194
SM(d41:2) A	Sphingomyelin	0.05 ( 0.01, 0.08)	0.009	0.151
SM(d41:2) B	Sphingomyelin	0.05 ( 0.01, 0.09)	0.008	0.145
SM(d43:1) A	Sphingomyelin	0.05 ( 0.02, 0.09)	0.005	0.131
SM(d43:1) B	Sphingomyelin	0.04 ( 0.00, 0.08)	0.029	0.234
SM(d43:2) A	Sphingomyelin	0.04 ( 0.01, 0.08)	0.017	0.194
TAG(40:0)	Triacylglycerol	-0.05 (-0.08,-0.02)	0.003	0.099
TAG(42:0)	Triacylglycerol	-0.04 (-0.07, 0.00)	0.027	0.227
TAG(42:1)	Triacylglycerol	-0.05 (-0.08,-0.02)	0.004	0.103
TAG(42:2)	Triacylglycerol	-0.05 (-0.09,-0.02)	0.003	0.089
TAG(46:4) A	Triacylglycerol	-0.04 (-0.07,-0.01)	0.024	0.22
TAG(54:2)	Triacylglycerol	-0.05 (-0.08,-0.01)	0.014	0.191
TAG(54:3)	Triacylglycerol	-0.05 (-0.09,-0.01)	0.006	0.134
TAG(54:4)/TAG(18:1/18:1/18:2)	Triacylglycerol	-0.04 (-0.07,-0.01)	0.025	0.22
TAG(54:6)/TAG(16:0/18:2/20:4)	Triacylglycerol	0.05 ( 0.02, 0.09)	0.002	0.078
TAG(56:3)	Triacylglycerol	-0.04 (-0.08,-0.01)	0.016	0.194
Processed meat-related lipids
CE(20:5)	Cholesterol ester	-0.05 (-0.08,-0.02)	0.005	0.15
CE(22:5) A	Cholesterol ester	0.06 ( 0.03, 0.10)	<0.001	0.034
CE(22:5) B	Cholesterol ester	0.05 ( 0.01, 0.08)	0.007	0.178
LPC(14:0)	Lysophosphatidylcholine	-0.03 (-0.07, 0.00)	0.044	0.47
LPC(20:5)	Lysophosphatidylcholine	-0.06 (-0.09,-0.02)	0.002	0.093
LPC(24:0)	Lysophosphatidylcholine	-0.06 (-0.09,-0.02)	0.002	0.09
LPE(20:3)	Lysophosphatidylethanolamine	-0.04 (-0.08,-0.01)	0.02	0.305
PC(28:0)	Phosphatidylcholine	-0.05 (-0.08,-0.01)	0.005	0.15
PC(30:0)	Phosphatidylcholine	-0.04 (-0.08,-0.01)	0.016	0.27
PC(31:0)	Phosphatidylcholine	-0.04 (-0.08,-0.01)	0.012	0.239
PC(32:2)	Phosphatidylcholine	-0.04 (-0.08,-0.01)	0.02	0.305
PC(32:3)	Phosphatidylcholine	-0.04 (-0.07,-0.01)	0.024	0.334
PC(34:3) B	Phosphatidylcholine	-0.05 (-0.08,-0.01)	0.009	0.201
PC(34:3) C	Phosphatidylcholine	-0.04 (-0.07, 0.00)	0.044	0.47
PC(34:4)	Phosphatidylcholine	-0.04 (-0.07, 0.00)	0.047	0.478
PC(35:4)	Phosphatidylcholine	-0.04 (-0.07, 0.00)	0.037	0.412
PC(36:4) A	Phosphatidylcholine	-0.04 (-0.07, 0.00)	0.032	0.377
PC(36:5) A	Phosphatidylcholine	-0.04 (-0.07, 0.00)	0.025	0.334
PC(36:5) B	Phosphatidylcholine	-0.05 (-0.08,-0.01)	0.005	0.153
PC(36:5) D	Phosphatidylcholine	-0.05 (-0.09,-0.02)	0.002	0.101
PC(36:6)	Phosphatidylcholine	-0.04 (-0.08,-0.01)	0.02	0.305
PC(37:5)	Phosphatidylcholine	-0.04 (-0.08,-0.01)	0.016	0.27
PC(38:5) A	Phosphatidylcholine	-0.04 (-0.07, 0.00)	0.044	0.47
PC(38:6) A	Phosphatidylcholine	-0.05 (-0.09,-0.01)	0.006	0.164
PC(38:7)	Phosphatidylcholine	-0.04 (-0.07, 0.00)	0.041	0.452
PC(40:5) B	Phosphatidylcholine	0.04 ( 0.01, 0.08)	0.023	0.328
PC(40:6) A	Phosphatidylcholine	-0.06 (-0.10,-0.03)	0.001	0.059
PC(40:7) A	Phosphatidylcholine	0.06 ( 0.03, 0.09)	0.001	0.051
PC(p-14:0/16:0)/PC(o-14:0/16:0)	Ether-phosphatidylcholine	-0.07 (-0.11,-0.04)	<0.001	0.012
PC(p-16:0/20:5)/PC(o-16:0/20:5)	Ether-phosphatidylcholine	-0.04 (-0.08,-0.01)	0.015	0.268
PC(p-16:0/22:6)/PC(o-16:1/22:6)	Ether-phosphatidylcholine	-0.04 (-0.07, 0.00)	0.03	0.371
PC(p-16:1/24:4)/PC(o-16:2/24:4)	Ether-phosphatidylcholine	-0.05 (-0.09,-0.02)	0.002	0.101
PC(p-16:1/26:2)/PC(o-16:2/26:2)	Ether-phosphatidylcholine	-0.04 (-0.08,-0.01)	0.014	0.25
PC(p-36:5)/PC(o-36:6)	Ether-phosphatidylcholine	-0.04 (-0.08,-0.01)	0.02	0.305
PC(p-42:5)/PC(o-42:6) A	Ether-phosphatidylcholine	-0.04 (-0.08,-0.01)	0.023	0.322
PE(p-18:0/22:5)/PE(o-18:1/22:5)	Ether-phosphatidylethanolamine	0.05 ( 0.01, 0.08)	0.006	0.157
SM(d14:1/29:0) A	Sphingomyelin	-0.04 (-0.07, 0.00)	0.034	0.396
SM(d15:0/16:1)	Sphingomyelin	-0.06 (-0.10,-0.03)	0.001	0.051
SM(d17:0/18:2) A	Sphingomyelin	-0.04 (-0.07, 0.00)	0.025	0.334
SM(d30:1) A	Sphingomyelin	-0.10 (-0.13,-0.06)	<0.001	<0.001
SM(d30:1) B	Sphingomyelin	-0.08 (-0.12,-0.05)	<0.001	0.002
SM(d32:1) A	Sphingomyelin	-0.06 (-0.09,-0.02)	0.002	0.09
SM(d32:1) B	Sphingomyelin	-0.04 (-0.08,-0.01)	0.012	0.239
SM(d32:2) A	Sphingomyelin	-0.07 (-0.11,-0.04)	<0.001	0.022
SM(d32:2) B	Sphingomyelin	-0.07 (-0.11,-0.03)	<0.001	0.034
SM(d34:0) B	Sphingomyelin	0.04 ( 0.01, 0.08)	0.018	0.298
SM(d34:1) B	Sphingomyelin	0.04 ( 0.01, 0.07)	0.022	0.322
SM(d36:0) B	Sphingomyelin	0.04 ( 0.01, 0.08)	0.024	0.331
SM(d36:3) A	Sphingomyelin	-0.04 (-0.08,-0.01)	0.019	0.304
SM(d39:1) A	Sphingomyelin	-0.05 (-0.09,-0.02)	0.005	0.153
SM(d39:1) B	Sphingomyelin	-0.06 (-0.09,-0.02)	0.002	0.101
SM(d40:2) B	Sphingomyelin	-0.04 (-0.08,-0.01)	0.02	0.305
SM(d41:2)	Sphingomyelin	-0.04 (-0.07, 0.00)	0.046	0.478
SM(d41:2) B	Sphingomyelin	-0.05 (-0.08,-0.01)	0.013	0.239
SM(d42:2)	Sphingomyelin	0.06 ( 0.03, 0.10)	<0.001	0.047
SM(d42:2) A	Sphingomyelin	0.07 ( 0.04, 0.11)	<0.001	0.017
SM(d43:1) A	Sphingomyelin	-0.04 (-0.08,-0.01)	0.02	0.305
SM(d44:2) B	Sphingomyelin	0.05 ( 0.01, 0.08)	0.007	0.174
The letter A or B in the name of lipids indicates isomers. Only known lipids are shown.
¹ Beta coefficient of lipids associated with red or processed meat intake. Obtained by mixed-effects linear regression model, adjusting for age, sex, study center, education, BMI, fasting glucose, total energy intake, smoking, alcohol use, physical activity levels, lipid-lowering medication use, and hypertension status. Additional adjustment: grains intake. Random effects were used to account for…
² Adjusted for multiple testing using the Storey’s q-value method.

## Sheet: suppl_tableS9
Supplemental Table S9. Lipid species associated with red or processed meat intake (P<0.05), further adjusted for red or processed meat intake
		Association with meat intake
Lipids	Class	Beta (95%CI)¹	P value	q value2
Red meat-related lipids
CE(18:0)	Cholesterol ester	0.06 ( 0.03, 0.10)	0.001	0.035
CE(18:1)	Cholesterol ester	0.05 ( 0.01, 0.09)	0.008	0.122
CE(18:3)	Cholesterol ester	0.05 ( 0.01, 0.08)	0.011	0.138
CE(20:2)	Cholesterol ester	0.04 ( 0.00, 0.08)	0.027	0.215
CE(20:3)	Cholesterol ester	0.05 ( 0.01, 0.08)	0.013	0.147
CE(20:4)	Cholesterol ester	0.04 ( 0.01, 0.08)	0.023	0.199
CE(20:5)	Cholesterol ester	0.05 ( 0.01, 0.08)	0.013	0.145
CE(22:2)	Cholesterol ester	0.04 ( 0.00, 0.07)	0.04	0.247
CER(d34:0)	Ceramide	-0.04 (-0.08, 0.00)	0.031	0.228
PC(13:1/26:4)	Phosphatidylcholine	0.04 ( 0.00, 0.07)	0.05	0.274
PC(17:0/20:3)	Phosphatidylcholine	0.04 ( 0.00, 0.07)	0.027	0.215
PC(37:4)	Phosphatidylcholine	0.04 ( 0.00, 0.08)	0.027	0.215
PC(37:5)	Phosphatidylcholine	0.04 ( 0.00, 0.08)	0.036	0.233
PC(38:6) C	Phosphatidylcholine	-0.04 (-0.07, 0.00)	0.048	0.272
PC(42:5)	Phosphatidylcholine	-0.04 (-0.07,-0.01)	0.024	0.2
PC(p-14:0/20:3)/PC(o-14:0/20:3)	Ether-phosphatidylcholine	0.04 ( 0.00, 0.07)	0.037	0.235
PC(p-14:0/20:4)/PC(o-14:0/20:4)	Ether-phosphatidylcholine	0.05 ( 0.01, 0.08)	0.007	0.114
PC(p-14:0/22:3)/PC(o-14:0/22:3)	Ether-phosphatidylcholine	0.05 ( 0.01, 0.08)	0.007	0.114
PC(p-16:0/20:5)/PC(o-16:0/20:5)	Ether-phosphatidylcholine	0.08 ( 0.05, 0.12)	<0.001	0.001
PC(p-16:0/22:5)/PC(o-16:1/22:5)	Ether-phosphatidylcholine	0.06 ( 0.02, 0.10)	0.002	0.062
PC(p-16:0/22:6)/PC(o-16:0/22:6)	Ether-phosphatidylcholine	0.04 ( 0.00, 0.07)	0.039	0.247
PC(p-16:0/22:6)/PC(o-16:1/22:6)	Ether-phosphatidylcholine	0.06 ( 0.02, 0.09)	0.001	0.048
PC(p-18:0/20:4)/PC(o-18:1/20:4)	Ether-phosphatidylcholine	0.05 ( 0.01, 0.08)	0.006	0.112
PC(p-18:0/22:4)/PC(o-18:0/22:4)	Ether-phosphatidylcholine	0.04 ( 0.01, 0.07)	0.022	0.193
PC(p-18:1/20:4)/PC(o-18:2/20:4)	Ether-phosphatidylcholine	0.05 ( 0.01, 0.08)	0.011	0.138
PC(p-18:1/26:2)/PC(o-18:2/26:2)	Ether-phosphatidylcholine	0.04 ( 0.01, 0.08)	0.023	0.199
PC(p-18:2/17:0)/PC(o-18:3/17:0)	Ether-phosphatidylcholine	0.04 ( 0.01, 0.08)	0.021	0.19
PC(p-22:2/18:5)/PC(o-22:3/18:5)	Ether-phosphatidylcholine	0.04 ( 0.01, 0.08)	0.021	0.19
PC(p-22:3/18:5)/PC(o-22:4/18:5)	Ether-phosphatidylcholine	0.08 ( 0.04, 0.12)	<0.001	0.001
PC(p-34:2)/PC(o-34:3)	Ether-phosphatidylcholine	0.05 ( 0.02, 0.09)	0.003	0.076
PC(p-36:1)/PC(o-36:2) A	Ether-phosphatidylcholine	0.04 ( 0.00, 0.07)	0.046	0.265
PC(p-36:1)/PC(o-36:2) B	Ether-phosphatidylcholine	0.05 ( 0.01, 0.08)	0.013	0.149
PC(p-36:2)/PC(o-36:3)	Ether-phosphatidylcholine	0.06 ( 0.02, 0.09)	0.002	0.067
PC(p-36:3)/PC(o-36:4)	Ether-phosphatidylcholine	0.07 ( 0.03, 0.10)	<0.001	0.014
PC(p-36:4)/PC(o-36:5)	Ether-phosphatidylcholine	0.09 ( 0.05, 0.13)	<0.001	0.001
PC(p-36:5)/PC(o-36:6)	Ether-phosphatidylcholine	0.08 ( 0.05, 0.12)	<0.001	0.001
PC(p-38:2)/PC(o-38:3)	Ether-phosphatidylcholine	0.05 ( 0.01, 0.08)	0.009	0.128
PC(p-38:3)/PC(o-38:4) B	Ether-phosphatidylcholine	0.06 ( 0.02, 0.09)	0.002	0.07
PC(p-38:4)/PC(o-38:5) A	Ether-phosphatidylcholine	0.05 ( 0.02, 0.09)	0.004	0.082
PC(p-38:4)/PC(o-38:5) B	Ether-phosphatidylcholine	0.10 ( 0.06, 0.14)	<0.001	<0.001
PC(p-38:5)/PC(o-38:6) B	Ether-phosphatidylcholine	0.07 ( 0.04, 0.11)	<0.001	0.006
PC(p-38:6)/PC(o-38:7)	Ether-phosphatidylcholine	0.06 ( 0.03, 0.10)	0.001	0.038
PC(p-40:3)/PC(o-40:4)	Ether-phosphatidylcholine	0.05 ( 0.02, 0.09)	0.003	0.072
PC(p-40:4)/PC(o-40:5)	Ether-phosphatidylcholine	0.04 ( 0.00, 0.07)	0.034	0.23
PC(p-40:6)/PC(o-40:7) B	Ether-phosphatidylcholine	0.07 ( 0.03, 0.10)	<0.001	0.018
PC(p-42:3)/PC(o-42:4)	Ether-phosphatidylcholine	0.05 ( 0.02, 0.09)	0.003	0.075
PC(p-42:4)/PC(o-42:5)	Ether-phosphatidylcholine	0.04 ( 0.00, 0.07)	0.035	0.23
PC(p-42:5)/PC(o-42:6) A	Ether-phosphatidylcholine	0.04 ( 0.01, 0.08)	0.018	0.17
PC(p-42:5)/PC(o-42:6) B	Ether-phosphatidylcholine	0.05 ( 0.01, 0.08)	0.008	0.118
PC(p-44:4)/PC(o-44:5)	Ether-phosphatidylcholine	0.05 ( 0.02, 0.09)	0.003	0.082
PC(p-44:5)/PC(o-44:6)	Ether-phosphatidylcholine	0.05 ( 0.01, 0.08)	0.007	0.114
PE(18:2/18:2)	Phosphatidylethanolamine	-0.04 (-0.07, 0.00)	0.037	0.237
PE(36:4e)/PE(16:0e/20:4)	Phosphatidylethanolamine	0.04 ( 0.00, 0.07)	0.032	0.229
PE(p-18:0/20:5)/PE(o-18:1/20:5)	Ether-phosphatidylethanolamine	0.05 ( 0.02, 0.09)	0.004	0.082
PE(p-36:1)/PE(o-36:2) A	Ether-phosphatidylethanolamine	0.04 ( 0.00, 0.07)	0.046	0.265
PE(p-36:1)/PE(o-36:2) B	Ether-phosphatidylethanolamine	0.05 ( 0.02, 0.09)	0.005	0.101
PE(p-36:4)/PE(o-36:5) A	Ether-phosphatidylethanolamine	0.05 ( 0.01, 0.08)	0.011	0.138
PE(p-36:4)/PE(o-36:5) B	Ether-phosphatidylethanolamine	0.06 ( 0.02, 0.09)	0.002	0.067
PE(p-38:3)/PE(o-38:4)	Ether-phosphatidylethanolamine	0.04 ( 0.00, 0.07)	0.039	0.244
PE(p-38:4)/PE(o-38:5)	Ether-phosphatidylethanolamine	0.09 ( 0.05, 0.12)	<0.001	0.001
PE(p-38:5)/PE(o-38:6) A	Ether-phosphatidylethanolamine	0.06 ( 0.03, 0.10)	0.001	0.031
PE(p-38:5)/PE(o-38:6) B	Ether-phosphatidylethanolamine	0.07 ( 0.03, 0.10)	<0.001	0.014
PE(p-40:5)/PE(o-40:6) B	Ether-phosphatidylethanolamine	0.05 ( 0.02, 0.09)	0.006	0.104
SM(d14:1/29:0) A	Sphingomyelin	0.05 ( 0.01, 0.08)	0.011	0.138
SM(d17:0/18:2) A	Sphingomyelin	0.04 ( 0.00, 0.07)	0.044	0.26
SM(d17:0/18:2) B	Sphingomyelin	0.04 ( 0.00, 0.07)	0.049	0.272
SM(d37:1) A	Sphingomyelin	0.05 ( 0.02, 0.09)	0.004	0.082
SM(d37:1) B	Sphingomyelin	0.05 ( 0.01, 0.09)	0.006	0.111
SM(d38:1) A	Sphingomyelin	0.04 ( 0.01, 0.08)	0.016	0.162
SM(d39:1) A	Sphingomyelin	0.05 ( 0.02, 0.09)	0.005	0.098
SM(d39:1) B	Sphingomyelin	0.05 ( 0.01, 0.08)	0.013	0.149
SM(d40:1) A	Sphingomyelin	0.04 ( 0.00, 0.07)	0.047	0.266
SM(d41:1) A	Sphingomyelin	0.07 ( 0.03, 0.10)	<0.001	0.014
SM(d41:2)	Sphingomyelin	0.05 ( 0.01, 0.08)	0.016	0.162
SM(d41:2) A	Sphingomyelin	0.05 ( 0.01, 0.08)	0.007	0.114
SM(d41:2) B	Sphingomyelin	0.05 ( 0.01, 0.09)	0.011	0.138
SM(d42:1) B	Sphingomyelin	0.04 ( 0.00, 0.07)	0.049	0.272
SM(d43:1) A	Sphingomyelin	0.05 ( 0.01, 0.09)	0.007	0.114
SM(d43:1) B	Sphingomyelin	0.04 ( 0.00, 0.08)	0.03	0.226
SM(d43:2) A	Sphingomyelin	0.04 ( 0.01, 0.08)	0.018	0.169
TAG(40:0)	Triacylglycerol	-0.05 (-0.08,-0.02)	0.004	0.082
TAG(42:0)	Triacylglycerol	-0.04 (-0.07, 0.00)	0.035	0.23
TAG(42:1)	Triacylglycerol	-0.05 (-0.08,-0.01)	0.005	0.101
TAG(42:2)	Triacylglycerol	-0.05 (-0.09,-0.02)	0.004	0.082
TAG(46:4) A	Triacylglycerol	-0.04 (-0.07, 0.00)	0.029	0.22
TAG(54:2)	Triacylglycerol	-0.04 (-0.08,-0.01)	0.02	0.186
TAG(54:3)	Triacylglycerol	-0.05 (-0.09,-0.02)	0.004	0.082
TAG(54:4)/TAG(18:1/18:1/18:2)	Triacylglycerol	-0.04 (-0.08,-0.01)	0.02	0.186
TAG(54:6)/TAG(16:0/18:2/20:4)	Triacylglycerol	0.05 ( 0.02, 0.09)	0.002	0.07
TAG(56:3)	Triacylglycerol	-0.05 (-0.08,-0.01)	0.016	0.162
Processed meat-related lipids
CE(20:5)	Cholesterol ester	-0.05 (-0.08,-0.01)	0.005	0.156
CE(22:5) A	Cholesterol ester	0.06 ( 0.03, 0.10)	<0.001	0.035
CE(22:5) B	Cholesterol ester	0.05 ( 0.01, 0.08)	0.007	0.181
LPC(14:0)	Lysophosphatidylcholine	-0.04 (-0.07, 0.00)	0.043	0.459
LPC(20:5)	Lysophosphatidylcholine	-0.06 (-0.09,-0.02)	0.002	0.097
LPC(24:0)	Lysophosphatidylcholine	-0.06 (-0.09,-0.02)	0.001	0.086
LPE(20:3)	Lysophosphatidylethanolamine	-0.04 (-0.08,-0.01)	0.019	0.308
PC(28:0)	Phosphatidylcholine	-0.05 (-0.08,-0.02)	0.004	0.14
PC(30:0)	Phosphatidylcholine	-0.04 (-0.08,-0.01)	0.015	0.265
PC(31:0)	Phosphatidylcholine	-0.04 (-0.08,-0.01)	0.013	0.235
PC(32:2)	Phosphatidylcholine	-0.04 (-0.08,-0.01)	0.019	0.31
PC(32:3)	Phosphatidylcholine	-0.04 (-0.07,-0.01)	0.024	0.328
PC(34:3) B	Phosphatidylcholine	-0.05 (-0.08,-0.01)	0.009	0.199
PC(34:3) C	Phosphatidylcholine	-0.04 (-0.07, 0.00)	0.043	0.461
PC(34:4)	Phosphatidylcholine	-0.03 (-0.07, 0.00)	0.048	0.475
PC(35:4)	Phosphatidylcholine	-0.04 (-0.07, 0.00)	0.04	0.442
PC(36:4) A	Phosphatidylcholine	-0.04 (-0.07, 0.00)	0.03	0.366
PC(36:5) A	Phosphatidylcholine	-0.04 (-0.07,-0.01)	0.024	0.331
PC(36:5) B	Phosphatidylcholine	-0.05 (-0.08,-0.01)	0.006	0.156
PC(36:5) D	Phosphatidylcholine	-0.05 (-0.09,-0.02)	0.002	0.11
PC(36:6)	Phosphatidylcholine	-0.04 (-0.08,-0.01)	0.021	0.315
PC(37:5)	Phosphatidylcholine	-0.04 (-0.08,-0.01)	0.017	0.291
PC(38:5) A	Phosphatidylcholine	-0.04 (-0.07, 0.00)	0.046	0.472
PC(38:6) A	Phosphatidylcholine	-0.05 (-0.08,-0.01)	0.006	0.168
PC(38:7)	Phosphatidylcholine	-0.04 (-0.07, 0.00)	0.041	0.449
PC(40:5) B	Phosphatidylcholine	0.04 ( 0.01, 0.08)	0.024	0.331
PC(40:6) A	Phosphatidylcholine	-0.06 (-0.10,-0.03)	0.001	0.059
PC(40:7) A	Phosphatidylcholine	0.06 ( 0.03, 0.09)	0.001	0.053
PC(p-14:0/16:0)/PC(o-14:0/16:0)	Ether-phosphatidylcholine	-0.07 (-0.11,-0.04)	<0.001	0.013
PC(p-16:0/20:5)/PC(o-16:0/20:5)	Ether-phosphatidylcholine	-0.04 (-0.08,-0.01)	0.018	0.296
PC(p-16:0/22:6)/PC(o-16:1/22:6)	Ether-phosphatidylcholine	-0.04 (-0.07, 0.00)	0.034	0.399
PC(p-16:1/24:4)/PC(o-16:2/24:4)	Ether-phosphatidylcholine	-0.05 (-0.09,-0.02)	0.002	0.11
PC(p-16:1/26:2)/PC(o-16:2/26:2)	Ether-phosphatidylcholine	-0.04 (-0.08,-0.01)	0.014	0.254
PC(p-36:5)/PC(o-36:6)	Ether-phosphatidylcholine	-0.04 (-0.08,-0.01)	0.023	0.326
PC(p-42:5)/PC(o-42:6) A	Ether-phosphatidylcholine	-0.04 (-0.07,-0.01)	0.024	0.331
PE(p-18:0/22:5)/PE(o-18:1/22:5)	Ether-phosphatidylethanolamine	0.05 ( 0.01, 0.08)	0.005	0.156
PE(p-38:4)/PE(o-38:5)	Ether-phosphatidylethanolamine	0.04 ( 0.00, 0.07)	0.048	0.475
SM(d14:1/29:0) A	Sphingomyelin	-0.04 (-0.07, 0.00)	0.038	0.424
SM(d15:0/16:1)	Sphingomyelin	-0.06 (-0.10,-0.03)	0.001	0.053
SM(d17:0/18:2) A	Sphingomyelin	-0.04 (-0.07, 0.00)	0.028	0.347
SM(d30:1) A	Sphingomyelin	-0.10 (-0.13,-0.06)	<0.001	<0.001
SM(d30:1) B	Sphingomyelin	-0.08 (-0.12,-0.05)	<0.001	0.002
SM(d32:1) A	Sphingomyelin	-0.06 (-0.09,-0.02)	0.002	0.091
SM(d32:1) B	Sphingomyelin	-0.04 (-0.08,-0.01)	0.012	0.235
SM(d32:2) A	Sphingomyelin	-0.07 (-0.11,-0.04)	<0.001	0.022
SM(d32:2) B	Sphingomyelin	-0.07 (-0.11,-0.03)	<0.001	0.035
SM(d34:0) B	Sphingomyelin	0.04 ( 0.01, 0.08)	0.018	0.296
SM(d34:1) B	Sphingomyelin	0.04 ( 0.01, 0.07)	0.022	0.326
SM(d36:0) B	Sphingomyelin	0.04 ( 0.01, 0.08)	0.023	0.326
SM(d36:3) A	Sphingomyelin	-0.04 (-0.08,-0.01)	0.02	0.312
SM(d39:1) A	Sphingomyelin	-0.05 (-0.09,-0.01)	0.006	0.159
SM(d39:1) B	Sphingomyelin	-0.06 (-0.09,-0.02)	0.002	0.11
SM(d40:2) B	Sphingomyelin	-0.04 (-0.08,-0.01)	0.021	0.315
SM(d41:2) B	Sphingomyelin	-0.04 (-0.08,-0.01)	0.014	0.256
SM(d42:2)	Sphingomyelin	0.06 ( 0.03, 0.10)	<0.001	0.043
SM(d42:2) A	Sphingomyelin	0.07 ( 0.04, 0.11)	<0.001	0.016
SM(d43:1) A	Sphingomyelin	-0.04 (-0.08,-0.01)	0.022	0.326
SM(d44:2) B	Sphingomyelin	0.05 ( 0.01, 0.08)	0.007	0.174
The letter A or B in the name of lipids indicates isomers. Only known lipids are shown.
¹ Beta coefficient of lipids associated with red or processed meat intake. Obtained by mixed-effects linear regression model, adjusting for age, sex, study center, education, BMI, fasting glucose, total energy intake, smoking, alcohol use, physical activity levels, lipid-lowering medication use, and hypertension status. Additional adjustment: unprocessed red meat (in processed meat analyses) or p…
² Adjusted for multiple testing using the Storey’s q-value method.

[truncated: 3 more sheets: suppl_tableS10, suppl_tableS11, suppl_tableS12]
